# Supplementary material for: Sesquiterpene Lactones with the 12,8-Guaianolide Skeleton from Algerian Centaurea omphalotricha
Source: MDPI journal article supplement (doi:10.3390/biom11071053), 2021-07-18
Supplement: s1 [file s1]

## Supplementary Material

### Sesquiterpene lactones with the 12,8- guaianolide skeleton from Algerian *Centaurea omphalotricha*

Sara Kebbi<sup>1,2</sup> Maria Letizia Ciavatta<sup>1,\*</sup> Ali Mokhtar Mahmoud<sup>1</sup>, Marianna Carbone<sup>1</sup>, Alessia Ligresti<sup>1</sup>, Ramdane Seghiri<sup>2</sup>, and Margherita Gavagnin<sup>1</sup>

<sup>1</sup>*Consiglio Nazionale delle Ricerche (CNR), Istituto di Chimica Biomolecolare (ICB), Via Campi Flegrei, 34 -80078- Pozzuoli, Napoli, Italy*

<sup>2</sup> *Unit of Valorization of Natural Resources, Bioactive Molecules and Physicochemical and Biological Analyzes (VARENBIOMOL), Department of Chemistry, Faculty of Exact Sciences, University of Mentouri Brothers Constantine 1, 25000 Constantine, Algérie*

**\*Corresponding author**

Email: [lciaavatta@icb.cnr.it](mailto:lciaavatta@icb.cnr.it); Phone +39 081 867 52 43 Fax +39 081 804 17 70

S1. Description of isolation of known compounds from *C.omphalotricha*

S2. Chemical structures of known compounds isolated from *C.omphalotricha*

S3. <sup>1</sup>H NMR spectrum of centaurolide A (**1**) (600 MHz, CDCl<sub>3</sub>)

S4. <sup>13</sup>C NMR spectrum of centaurolide A (**1**) (100 MHz, CDCl<sub>3</sub>)

S5. COSY spectrum of centaurolide A (**1**) (600 MHz, CDCl<sub>3</sub>)

S6. ed-HSQC spectrum of centaurolide A (**1**) (600 MHz, CDCl<sub>3</sub>)

S7. HMBC spectrum of centaurolide A (**1**) (600 MHz, CDCl<sub>3</sub>)

S8. NOESY spectrum of centaurolide A (**1**) (600 MHz, CDCl<sub>3</sub>)

S9. HR ESIMS spectrum of centaurolide A (**1**)

S10. <sup>1</sup>H NMR spectrum of centaurolide B (**2**) (600 MHz, CDCl<sub>3</sub>)

S11. <sup>13</sup>C NMR spectrum of centaurolide B (**2**) (100 MHz, CDCl<sub>3</sub>)

S12. COSY spectrum of centaurolide B (**2**) (400 MHz, CDCl<sub>3</sub>)

S13. HSQC spectrum of centaurolide B (**2**) (400 MHz, CDCl<sub>3</sub>)

S14. HMBC spectrum of centaurolide B (**2**) (600 MHz, CDCl<sub>3</sub>)

S15. NOESY spectrum of centaurolide B (**2**) (600 MHz, CDCl<sub>3</sub>)

S16. HR ESIMS spectrum of centaurolide B (**2**)

S17. <sup>1</sup>H NMR spectrum of inuviscolide (**3**) (600 MHz, CDCl<sub>3</sub>)

S18. <sup>13</sup>C NMR spectrum of inuviscolide (**3**) (150 MHz, CDCl<sub>3</sub>)

S19. COSY spectrum of inuviscolide (**3**) (600 MHz, CDCl<sub>3</sub>)

S20. ed-HSQC spectrum of inuviscolide (**3**) (600 MHz, CDCl<sub>3</sub>)

S21. HMBC spectrum of inuviscolide (**3**) (600 MHz, CDCl<sub>3</sub>)

S22. NOESY spectrum of inuviscolide (**3**) (600 MHz, CDCl<sub>3</sub>)

S23. <sup>1</sup>H NMR spectrum of dehydration derivative of inuviscolide (600 MHz, CDCl<sub>3</sub>)

S24. <sup>13</sup>C NMR spectrum of dehydration derivative of inuviscolide (600 MHz, CDCl<sub>3</sub>)

S25. <sup>1</sup>H NMR spectrum of dehydration derivative of inuviscolide (600 MHz, CDCl<sub>3</sub>)

S26. <sup>13</sup>C NMR spectrum of dehydration derivative of inuviscolide (600 MHz, CDCl<sub>3</sub>)

S27. <sup>1</sup>H NMR spectrum of alcohol (**4**) (600 MHz, CDCl<sub>3</sub>)

S28. <sup>13</sup>C NMR spectrum of alcohol (**4**) (150 MHz, CDCl<sub>3</sub>)

S29. COSY spectrum of alcohol (**4**) (600 MHz, CDCl<sub>3</sub>)

S30. ed-HSQC spectrum of alcohol (**4**) (600 MHz, CDCl<sub>3</sub>)

S31. HMBC spectrum of alcohol (**4**) (600 MHz, CDCl<sub>3</sub>)

S32. NOESY spectrum of alcohol (**4**) (600 MHz, CDCl<sub>3</sub>)

A portion (3.3 g) of the CHCl<sub>3</sub> extract of *C. omphalotricha* was first fractionated by SiO<sub>2</sub>-gel column chromatography by eluting with a gradient of CH<sub>2</sub>Cl<sub>2</sub> in petroleum ether (PE), and subsequently with a gradient of acetone in CH<sub>2</sub>Cl<sub>2</sub> to obtain 43 fractions (C1-C43). Nine selected fractions (C13, C16, C19, C-24, C27, C29, C30, C34, C37) were taken into consideration after TLC chromatography analysis and preliminary <sup>1</sup>H-NMR inspection. Fraction C13 (13.0 mg) was loaded onto a semipreparative TLC and developed with CHCl<sub>3</sub>/Acetone, 8:2 to yield a UV band at R<sub>f</sub> 0.5 corresponding to vanillin [1,2]. A portion (50 mg) of fraction C16 (86 mg) was loaded onto a AgNO<sub>3</sub> silicagel column using as eluent petroleum ether and increasing amount of Et<sub>2</sub>O. Subfractions eluted with petroleum ether/Et<sub>2</sub>O 6:4 and 1:1 contained 2 mg of pure  $\alpha$ -costic acid. A small part (20 mg) of fraction C19 (65.5 mg) was purified by semipreparative TLC with petroleum ether/Et<sub>2</sub>O 1:1 to yield methyl-4-hydroxy benzoate (2.0 mg) [3,4]. A portion of C24 (32.3 mg) was also purified by semipreparative TLC in *n*-hexane/AcOEt 1:1 to give two UV compounds, tomentosin (2.0 mg) at R<sub>f</sub> 0.6 and 1 $\beta$ ,5 $\beta$ -epoxyxanthatin at R<sub>f</sub> 0.5. Fraction C27 (94.8 mg) was purified by silicagel column using as eluent system petroleum ether with increasing amount of Et<sub>2</sub>O to give 12 subfractions. Subfraction C27-7 (27.7 mg) eluted with petroleum ether/Et<sub>2</sub>O 4:6 contained scopoletin (5.0 mg) [5,6] that was further purified by recrystallization in MeOH. Fraction C29 (200 mg) was loaded onto a silicagel column packed in PE and eluted initially with an increasing gradient of Et<sub>2</sub>O in PE (10:0, 9:1, 8:2, 7:3, 6:4, 5:5, 4:6, 3:7, 2:8, 1:9, 0:10), then with CHCl<sub>3</sub>, and finally with MeOH affording 13 subfractions C29-1 – C29-13. (for the new compounds see main text). Subfraction C29-6 (12.0 mg) was loaded onto a semipreparative TLC in petroleum ether/Et<sub>2</sub>O 1:1 showing a UV band at R<sub>f</sub> 0.45 that was identified as 3,5,11(13)-trien-eudesma-12-oic acid. Subfraction C29-10 (10.2 mg) was purified by semipreparative TLC (CHCl<sub>3</sub>/MeOH, 9.5:0.5) to give 2.7 mg of 11 $\beta$ ,13-dehydromelitensin. A portion (10.0 mg) of fraction C30 (54.4 mg) was purified by semipreparative TLC (CHCl<sub>3</sub>/Et<sub>2</sub>O, 1:1) to obtain 1.0 mg of cirsimaritin [7,8]. Half portion (130 mg) of fraction C34 (260.0 mg) was purified by silicagel column in a gradient of Et<sub>2</sub>O in petroleum ether to give 11 subfraction C34-1-C34-11. Subfraction C34-7 (20.0 mg) was further purified on a 10% AgNO<sub>3</sub> silicagel pipette Pasteur using a gradient of petroleum ether in CHCl<sub>3</sub> to yield 5.3 mg of viscic acid. A portion (150.0 mg) of fraction C37 (203.0 mg) was fractionated by silicagel column using first a gradient of Et<sub>2</sub>O in petroleum ether, then CHCl<sub>3</sub> and MeOH to give 15 subfractions. Subfraction C37-7 (28.7 mg) was recrystallized in MeOH to get 5.0 mg of ilicic acid.

1. Tiemann, F.; Haarmann, W. Ueber das Coniferin und seine Umwandlung in das aromatische Princip der Vanille. *Berichte der Dtsch. Chem. Gesellschaft* **1874**, 7, 608–623, doi:10.1002/cber.187400701193.
2. Mukonyi, K.W.; Ndiege, I.O. 2-Hydroxy-4-methoxybenzaldehyde: Aromatic taste modifying compound from *Mondia whytei* Skeels. *Bull. Chem. Soc. Ethiop.* **2001**, 15, 137-141, doi:10.4314/bcse.v15i2.20959.
3. Jong, T.-T.; Jean, M.-Y. Constituents of *Houttuynia cordata* and the Crystal Structure of Vomifoliol. *J. Chinese Chem. Soc.* **1993**, 40, 399–402, doi:10.1002/jccs.199300062.
4. Yoshioka, T.; Inokuchi, T.; Fujioka, S.; Kimura, Y. Phenolic compounds and flavonoids as plant growth regulators from fruit and leaf of *Vitex rotundifolia*. *Zeitschrift fur Naturforsch. - Sect. C J. Biosci.* **2004**, 59, 509-514, doi:10.1515/znc-2004-7-810.
5. Eijkman, J.F. Sur les principes vénéneux de la *Scopolia japonica*. *Recl. des Trav. Chim. des Pays-Bas* **1884**, 3, 169–181, doi:10.1002/recl.18840030602.
6. Vasconcelos, J.M.J.; Silva, A.M.S.; Cavaleiro, J.A.S. Chromones and flavanones from *Artemisia campestris* subsp. *maritima*. *Phytochemistry* **1998**, 49, 1421–1424, doi:10.1016/S0031-9422(98)00180-0.
7. Brieskorn, C.H.; Biechele, W. 6-Methoxygenkwanin - ein weiteres flavon aus labiaten. *Tetrahedron Lett.* **1969**, 10, 2603–2605, doi:10.1016/S0040-4039(01)88222-8.
8. Wang, R.-F.; Yang, X.-W.; Ma, C.-M.; Liu, H.-Y.; Shang, M.-Y.; Zhang, Q.-Y.; Cai, S.-Q.; Park, J.-H. Trollioside, a new compound from the flowers of *Trollius chinensis*. *J. Asian Nat. Prod. Res.* **2004**, 6, 139–144, doi:10.1080/1028602031000147393.

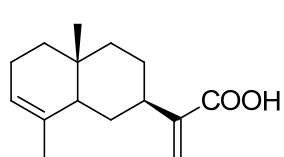

α-costic acid

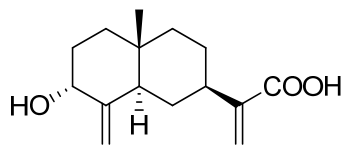

viscic acid

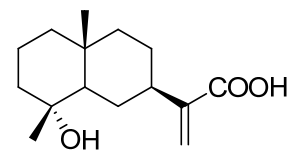

liicic acid

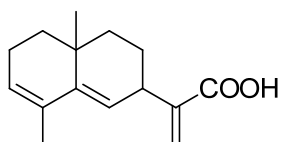

3,5,11-trien-eudesman-12-oic acid

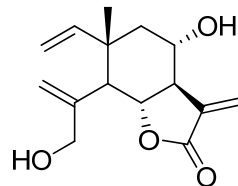

11β,13-dehydromelitensin

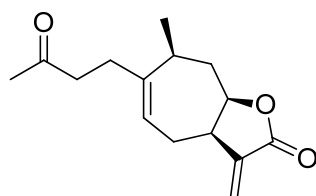

tomentosin

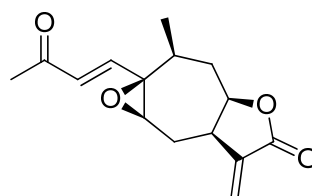

1β,5β-epoxyxanthatin

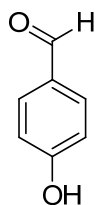

vanillin

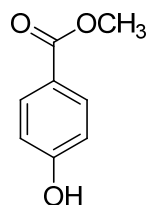

4-OH-Me-benzoate

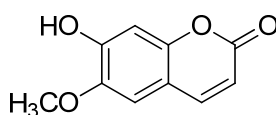

scopoletin

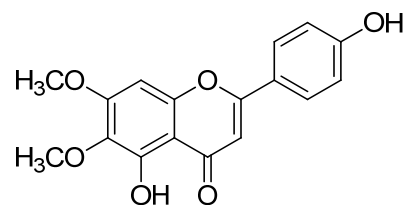

cirsimaritin

S2. Chemical structures of known compounds isolated from *C.omphalotricha*

S3

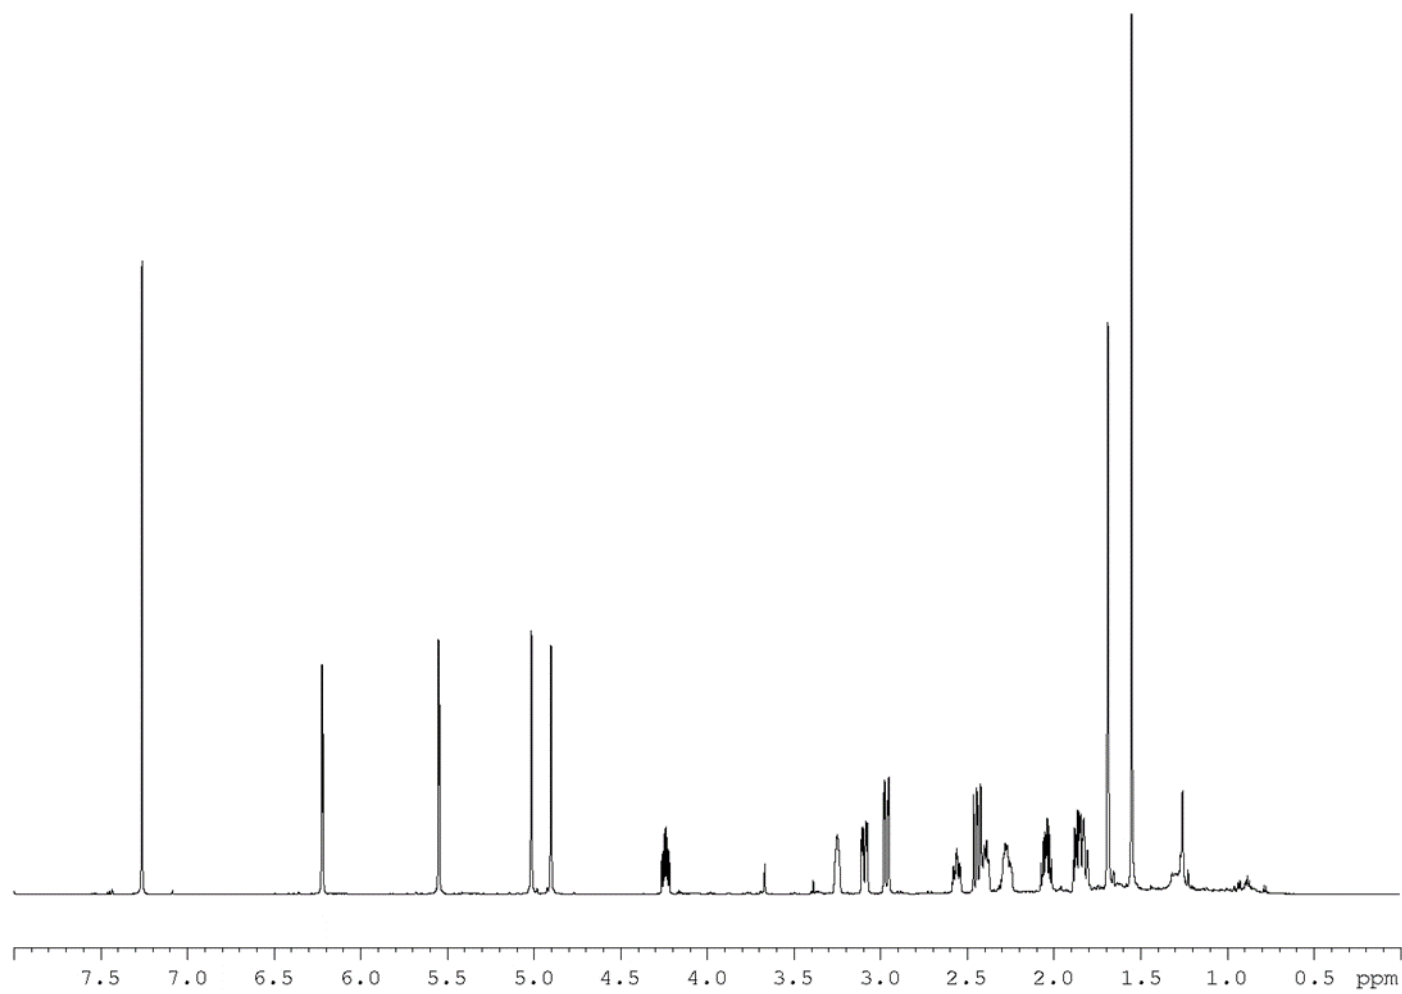

S3.  $^1\text{H}$  NMR spectrum of centaurolide A (**1**) (600 MHz,  $\text{CDCl}_3$ )

S4

onio: zgpgpgse.t1.be

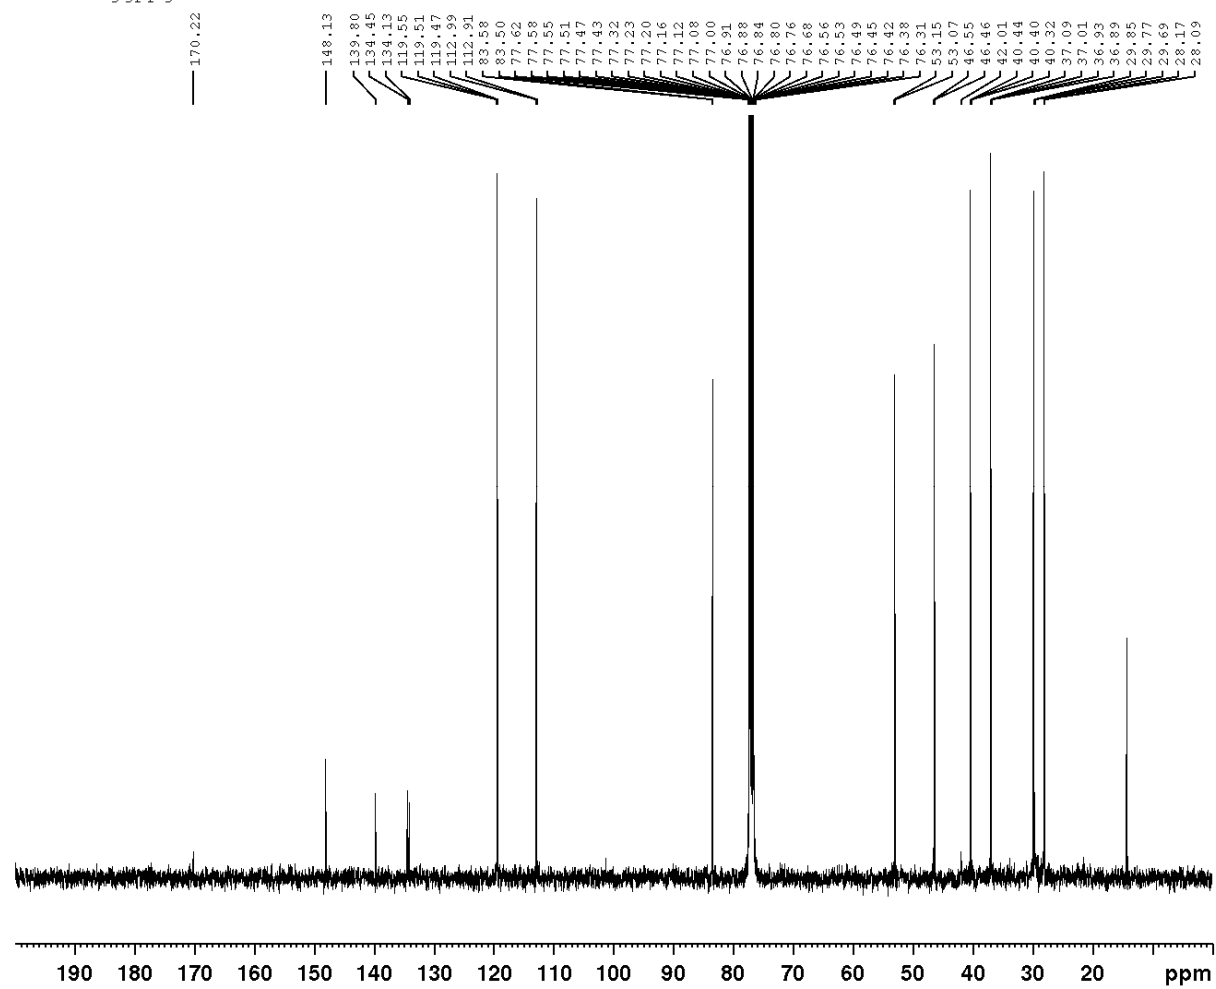

S4.  $^{13}\text{C}$  NMR spectrum of centaurolide A (**1**) (100 MHz,  $\text{CDCl}_3$ )

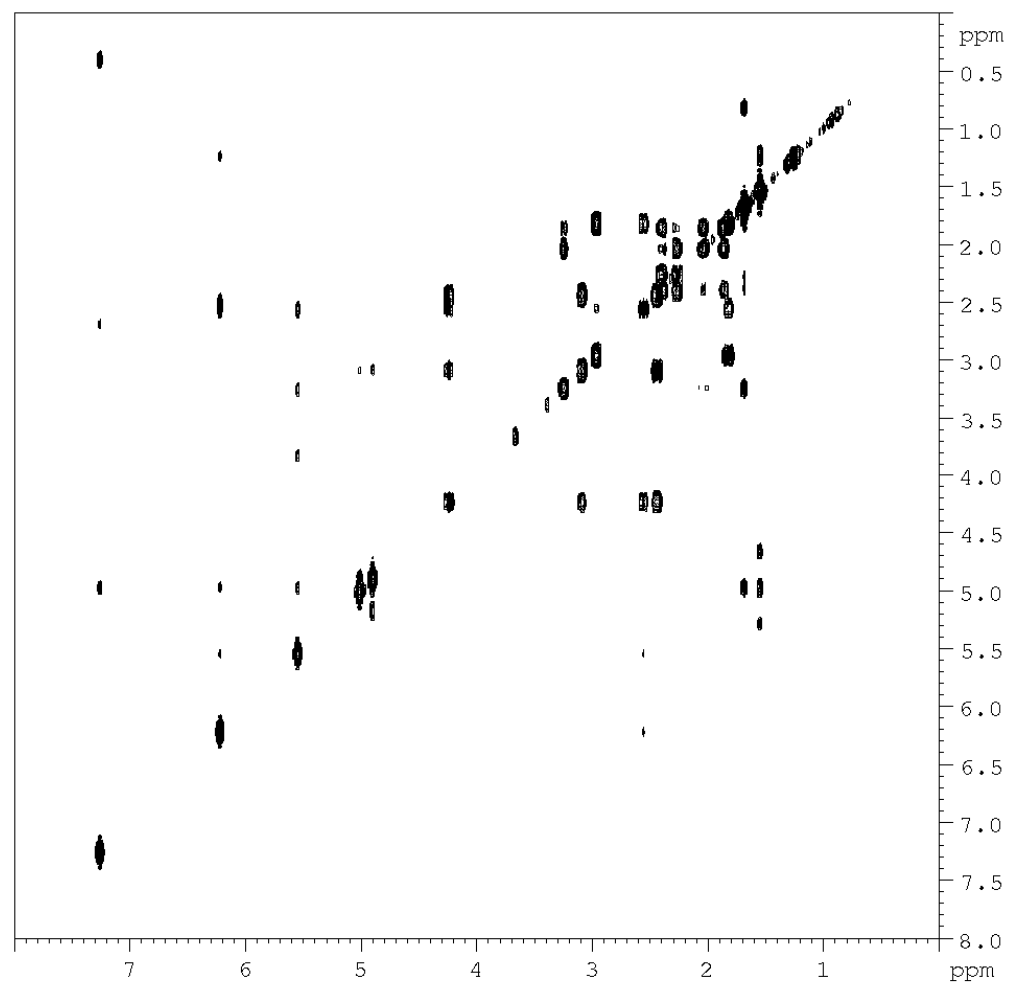

S5. COSY spectrum of centaurolide A (**1**) (600 MHz, CDCl<sub>3</sub>)

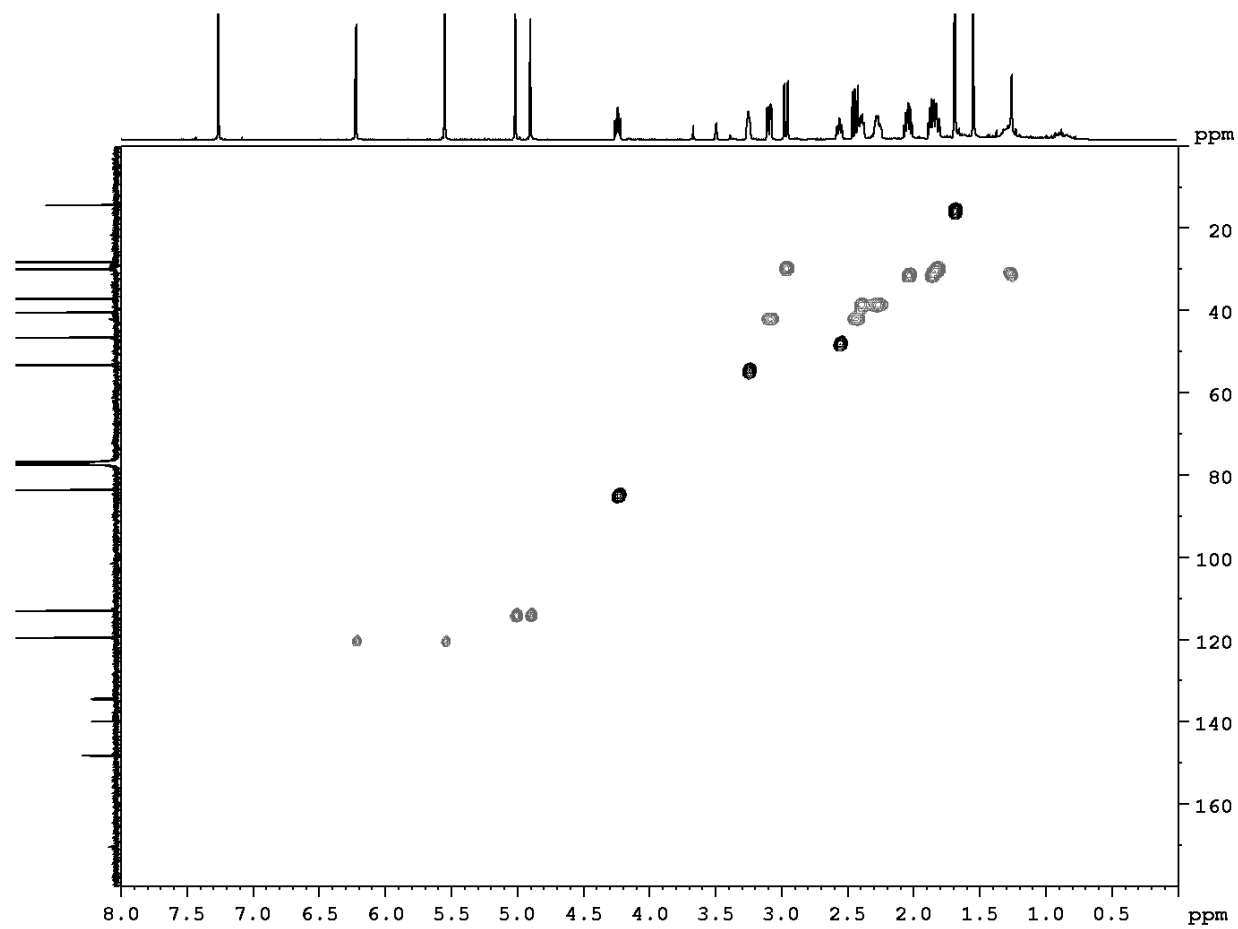

S6. ed-HSQC spectrum of centaurolide A (1) (600 MHz, CDCl<sub>3</sub>)



S7

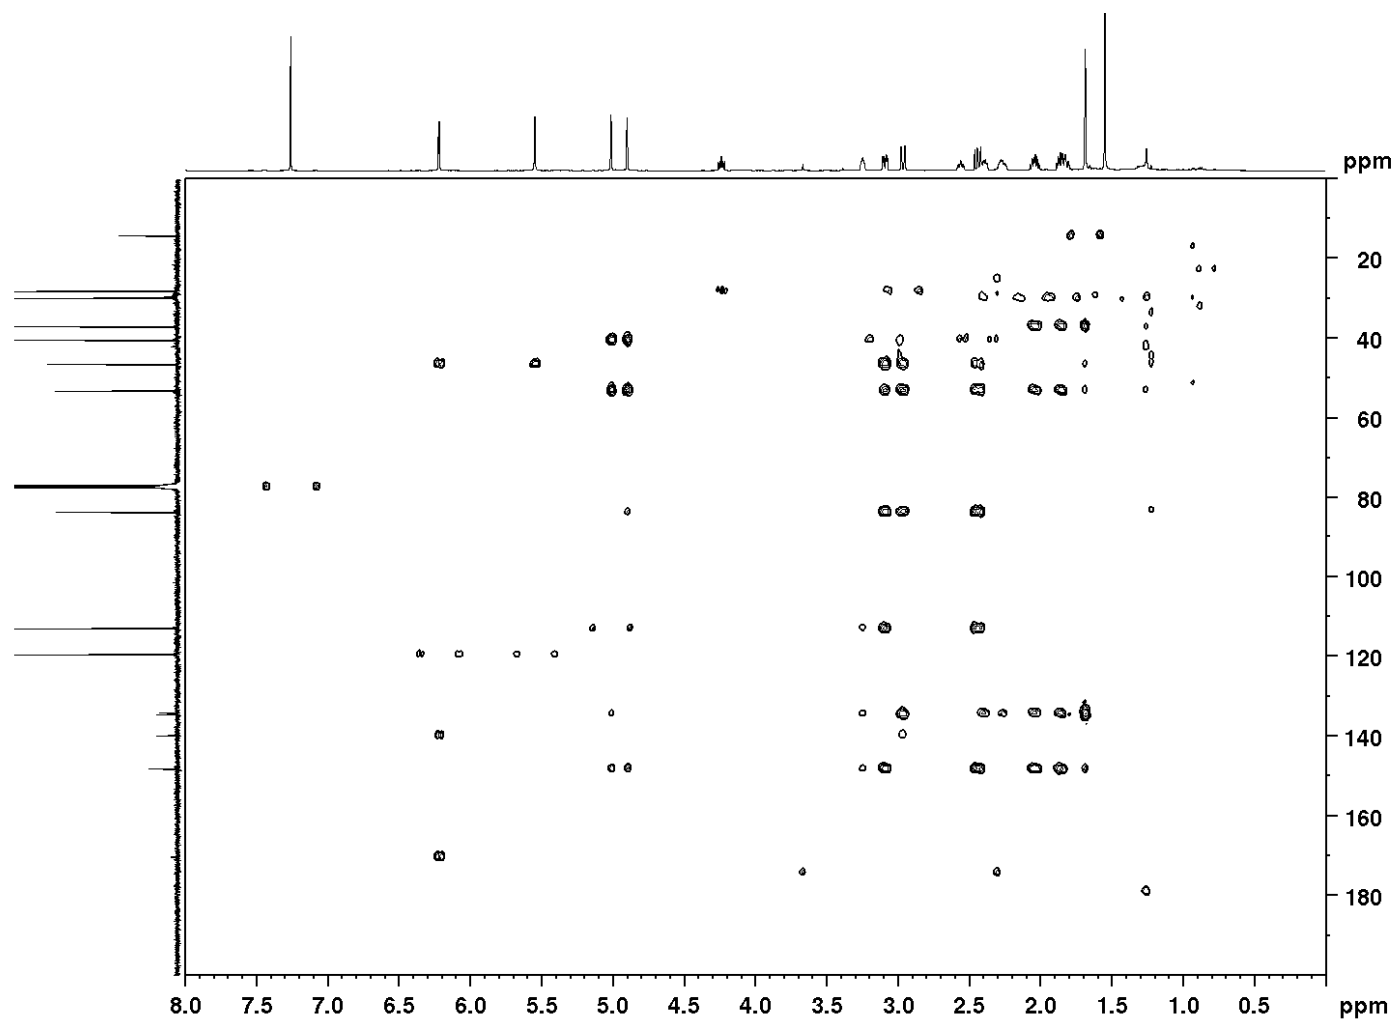

S7. HMBC spectrum of centaurolide A (**1**) (600 MHz, CDCl<sub>3</sub>)

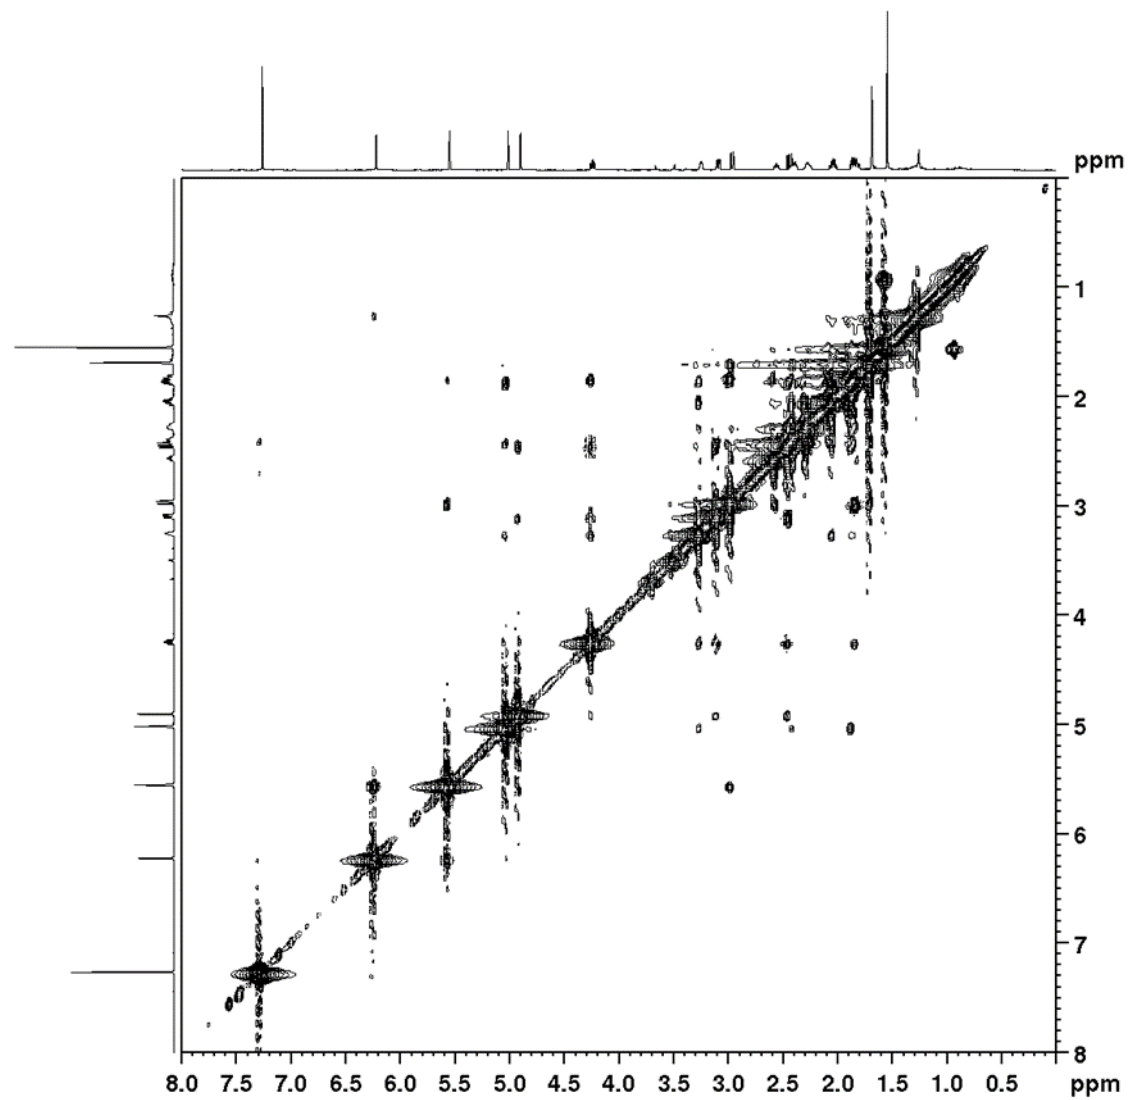

S8. NOESY spectrum of centaurolide A (**1**) (600 MHz, CDCl<sub>3</sub>).

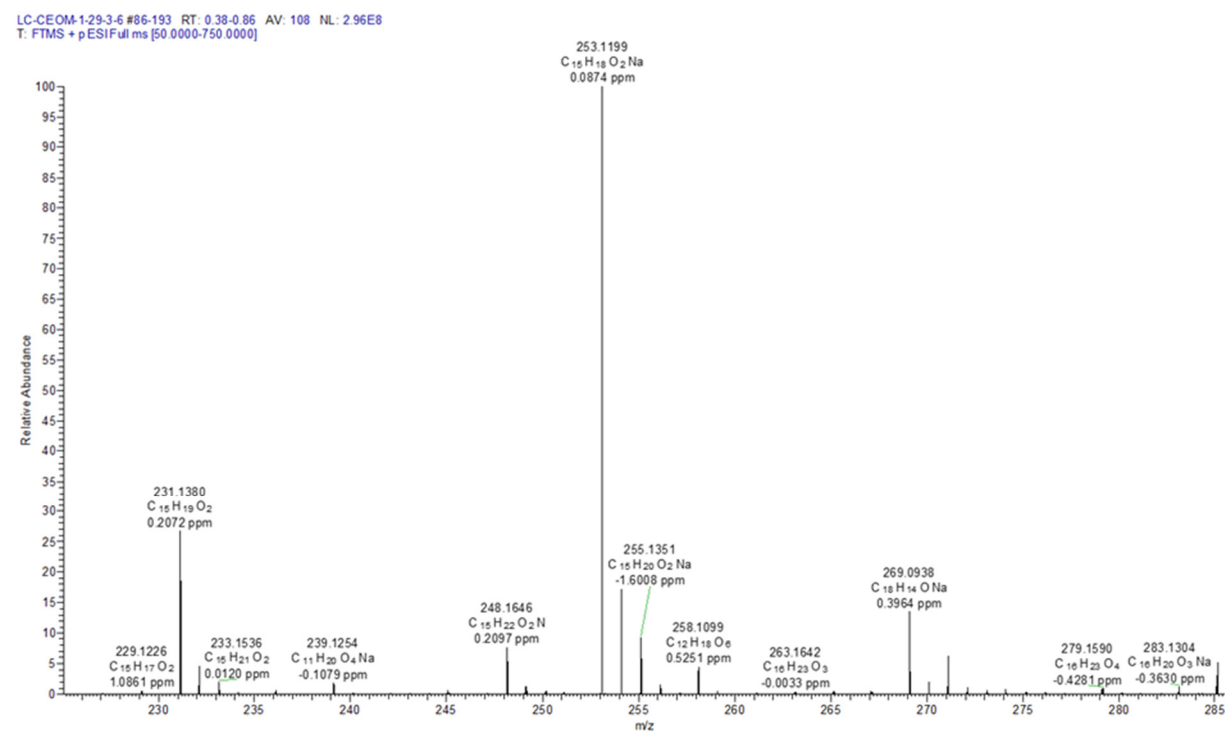

S9. HR ESIMS spectrum of centaurolide A (1)

*S10*

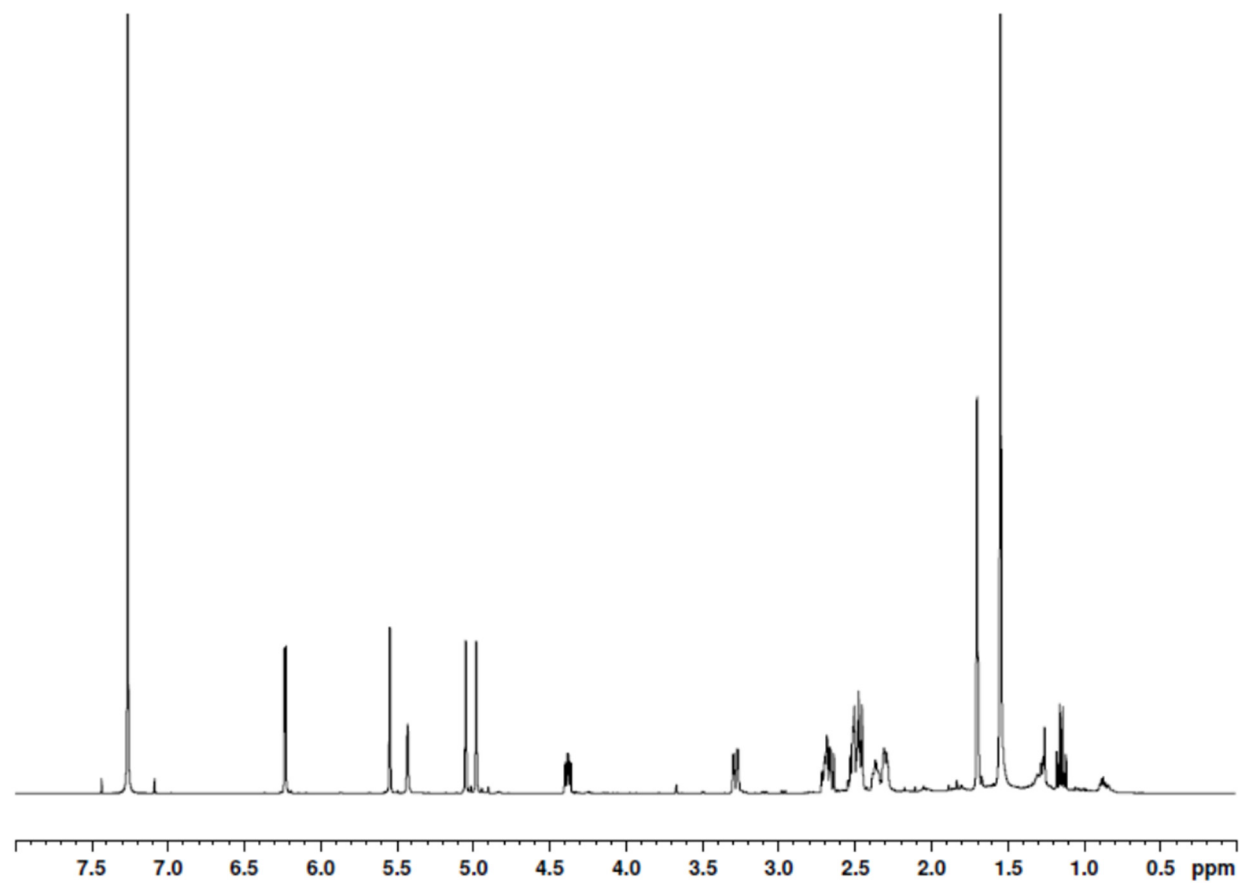

*S10.*  $^1\text{H}$  NMR spectrum of centaurolide B (**2**) (600 MHz,  $\text{CDCl}_3$ )

*S11*

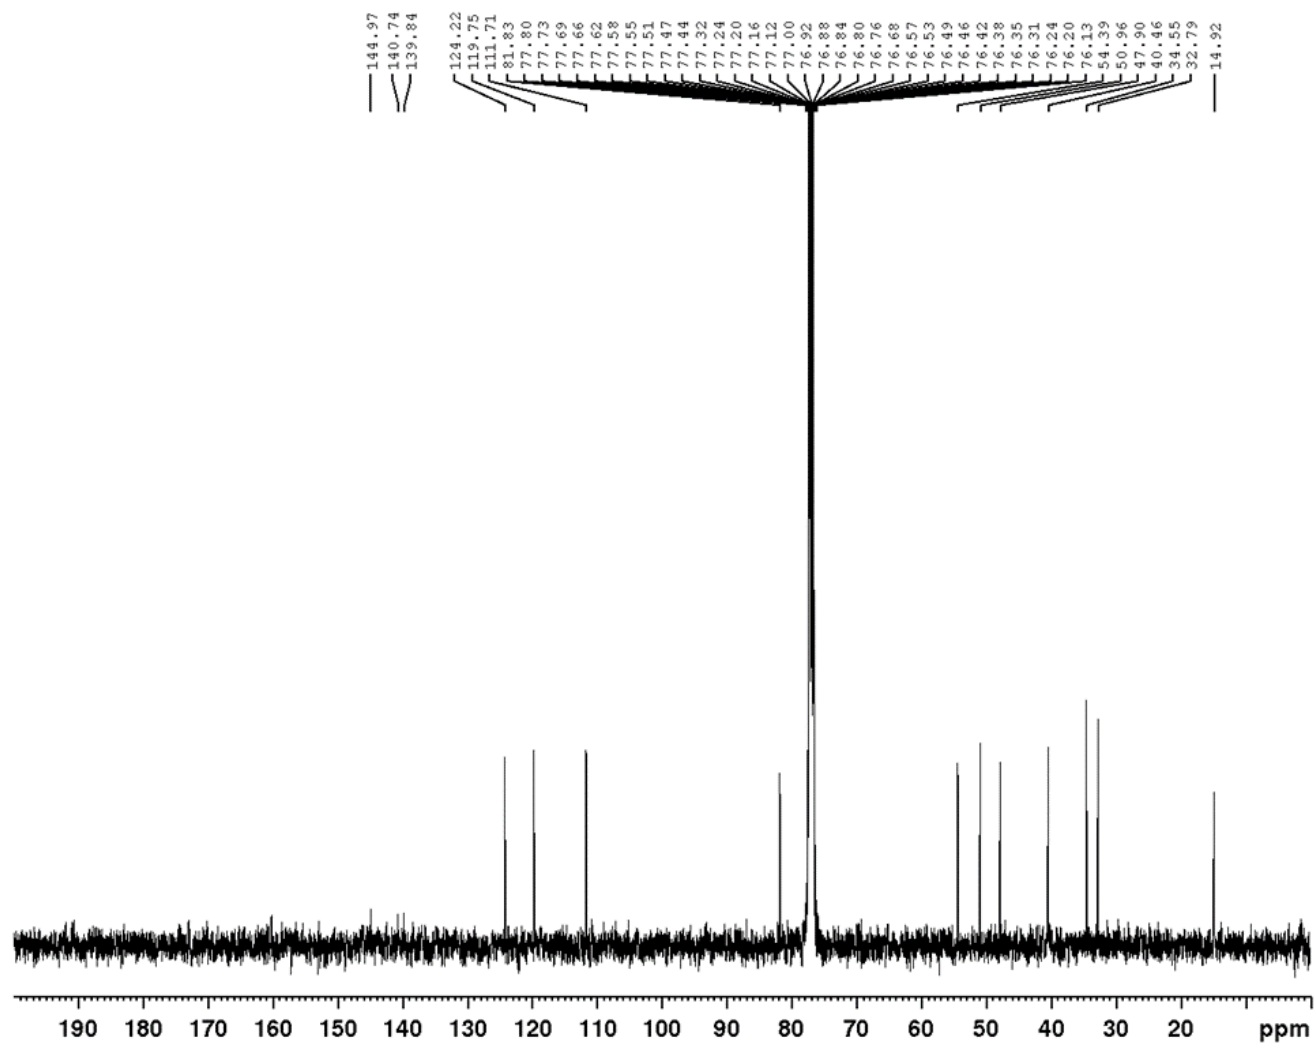

*S11.* <sup>13</sup>C NMR spectrum of centaurolide B (**2**) (100 MHz, CDCl<sub>3</sub>)

*S12*

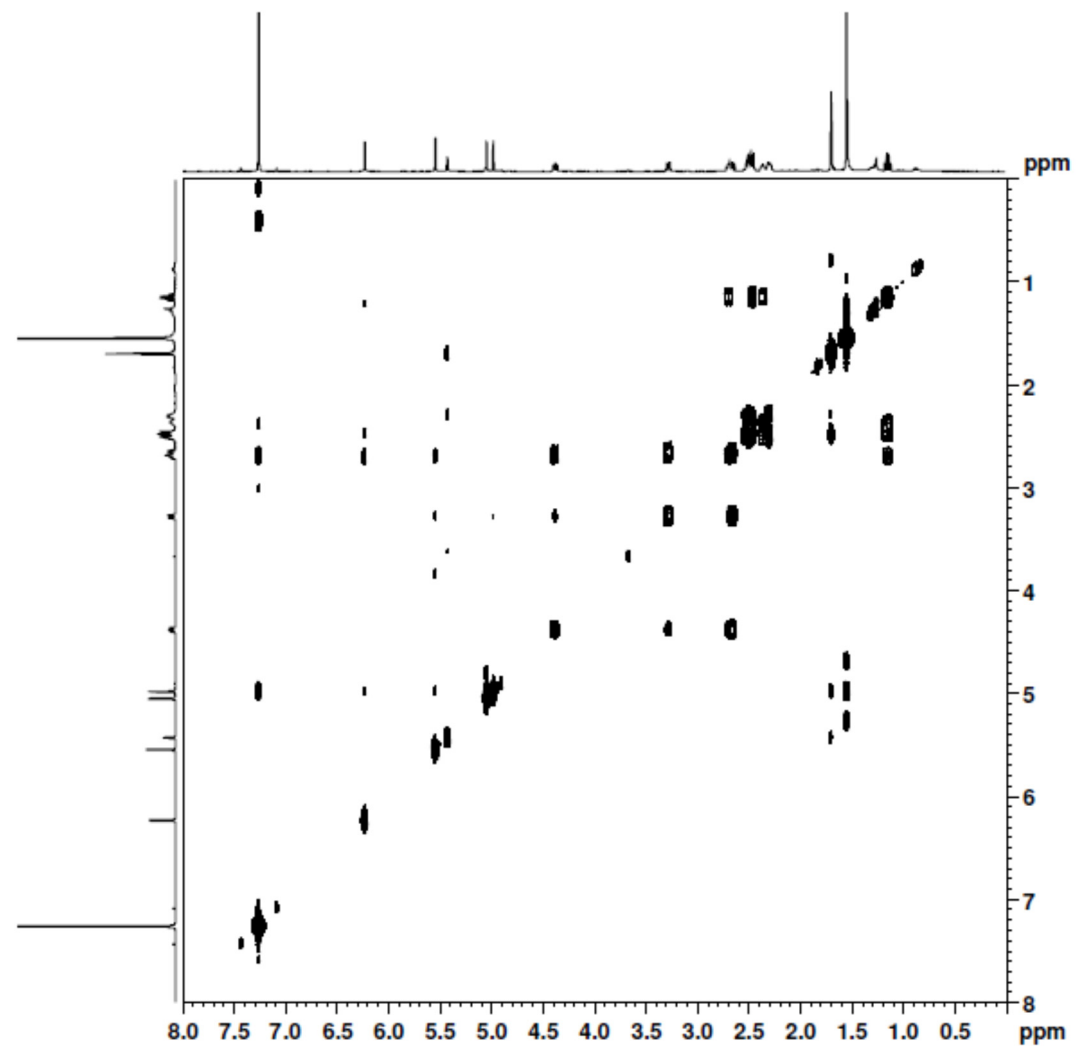

*S12*. COSY spectrum of centaurolide B (**2**) (400 MHz, CDCl<sub>3</sub>)

*S13*

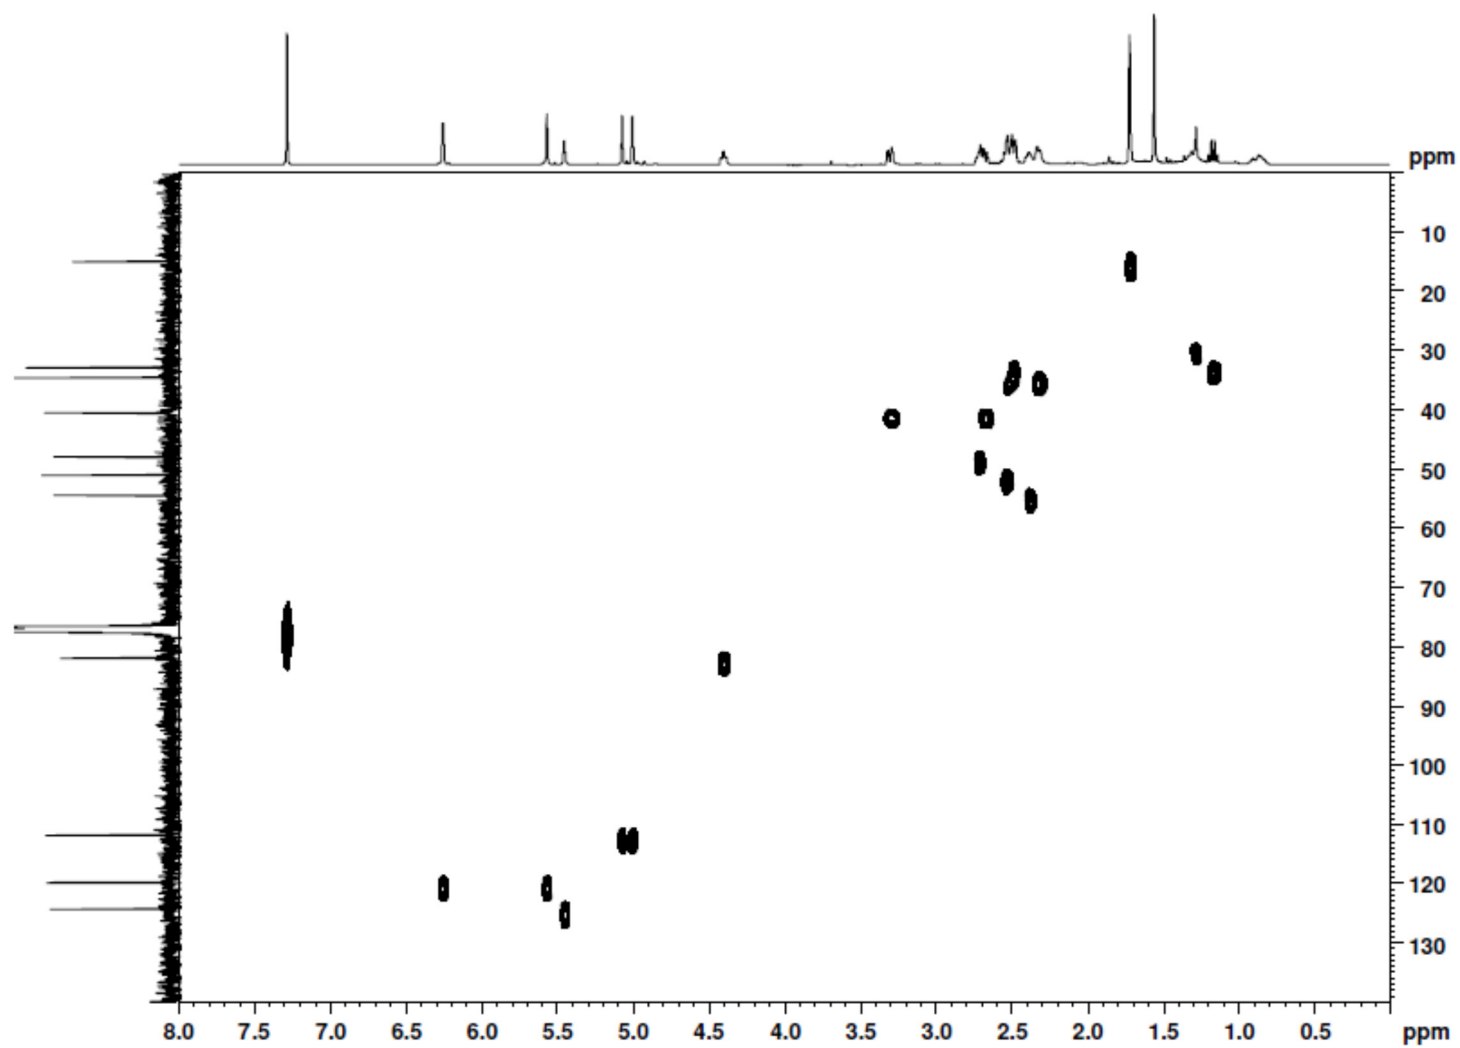

*S13*. HSQC spectrum of centaurolide B (**2**) (400 MHz, CDCl<sub>3</sub>)

*S14*

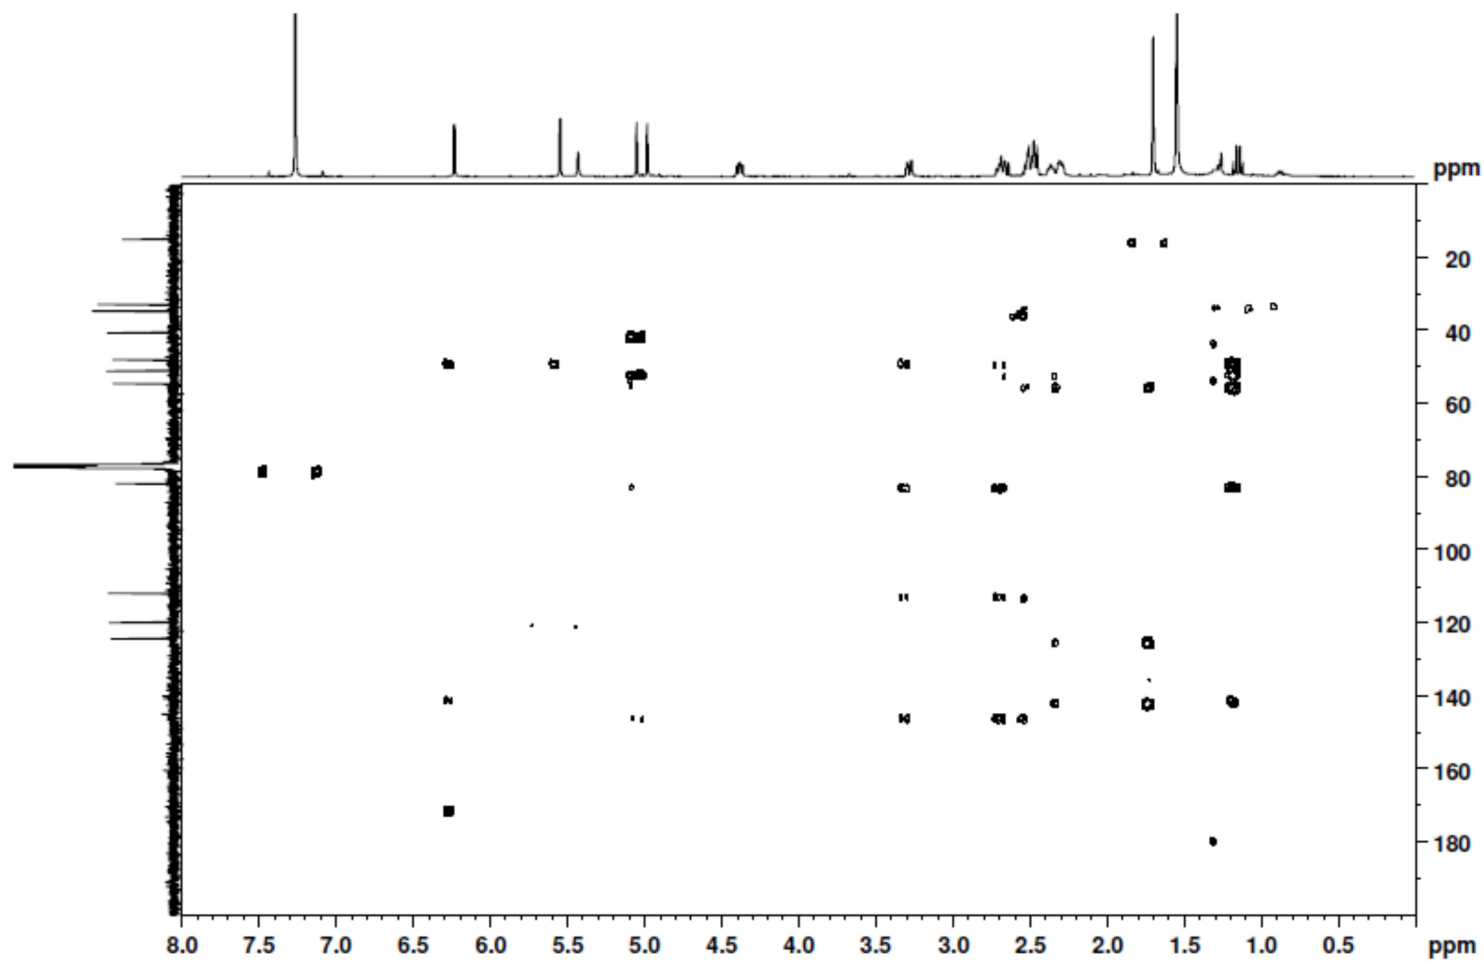

*S14*. HMBC spectrum of centaurolide B (**2**) (600 MHz, CDCl<sub>3</sub>)



*S15*

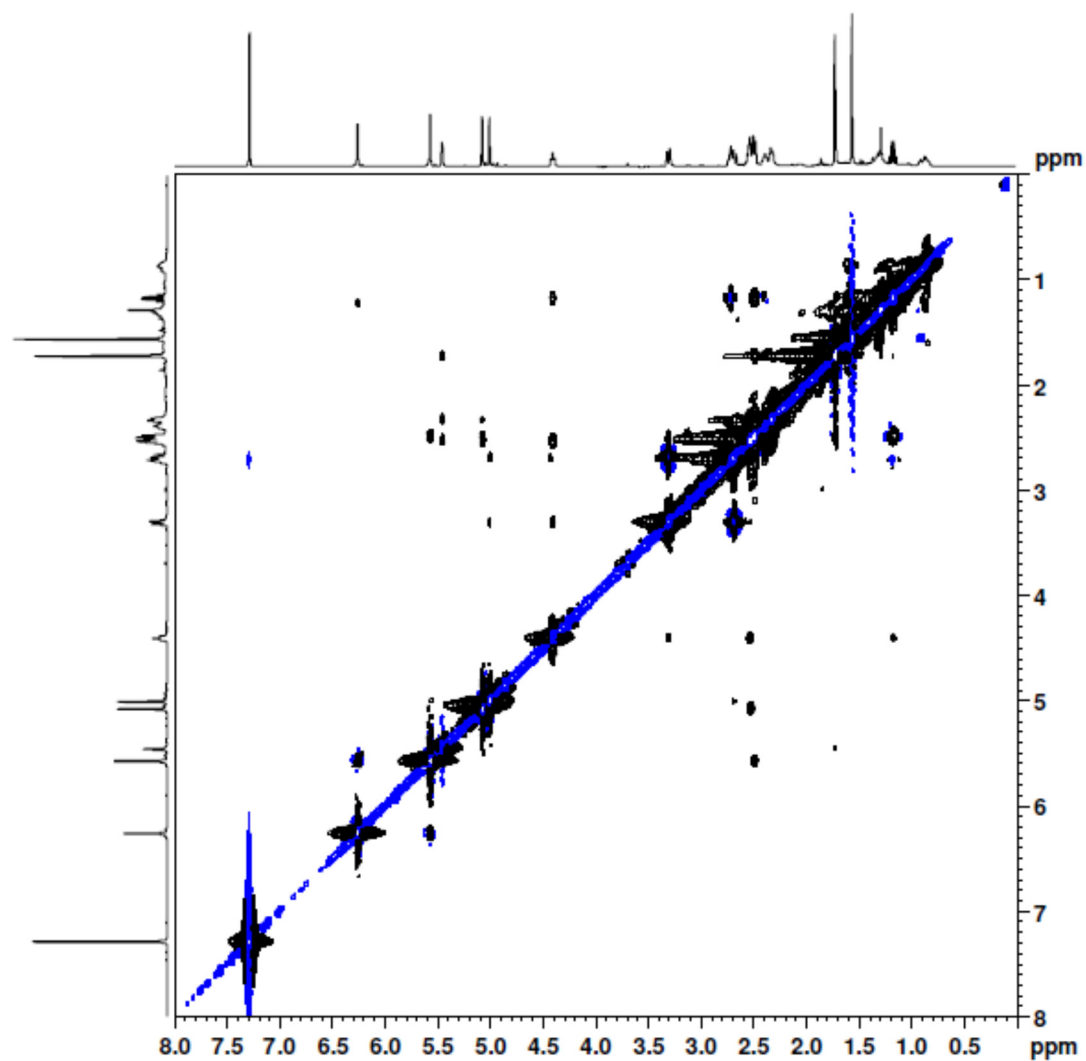

*S15*. NOESY spectrum of centaurolide B (**2**) (600 MHz, CDCl<sub>3</sub>)

# *S16*

LC-CEOM-1-29-3-10 #2-25 RT: 0.01-0.11 AV: 24 NL: 2.61E7  
T: FTMS + pESI Full ms [50.0000-750.0000]

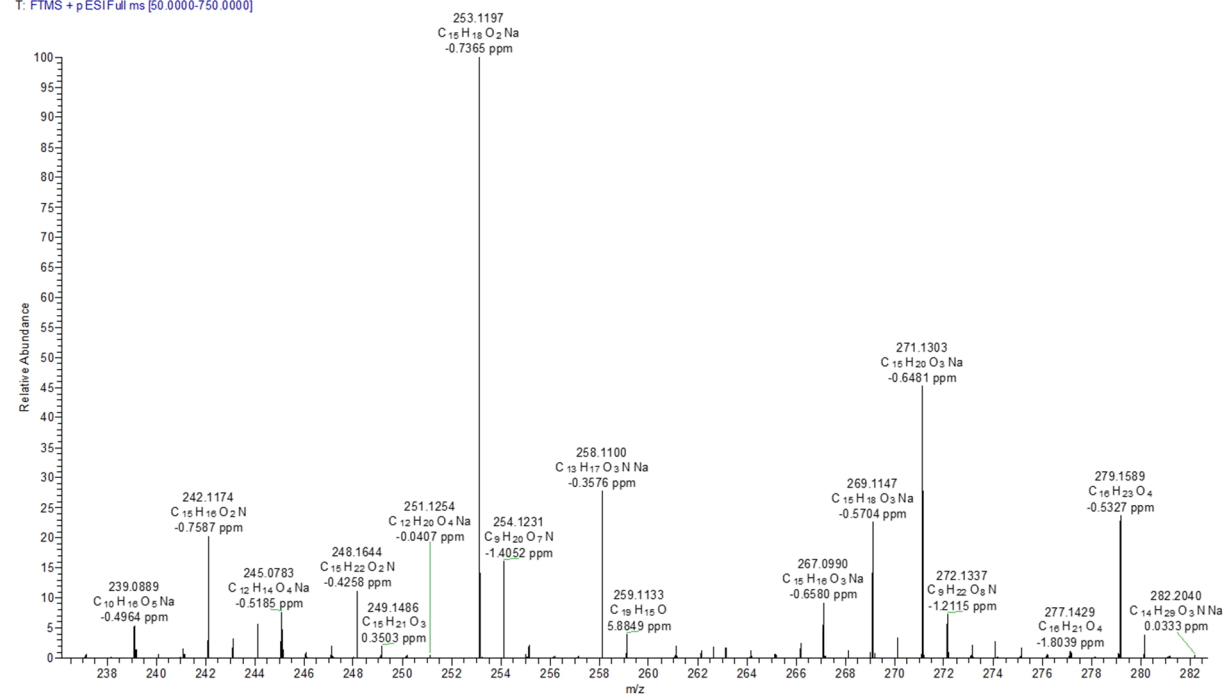

*S16*. HR ESIMS spectrum of centaurolide B (2)

*S17*

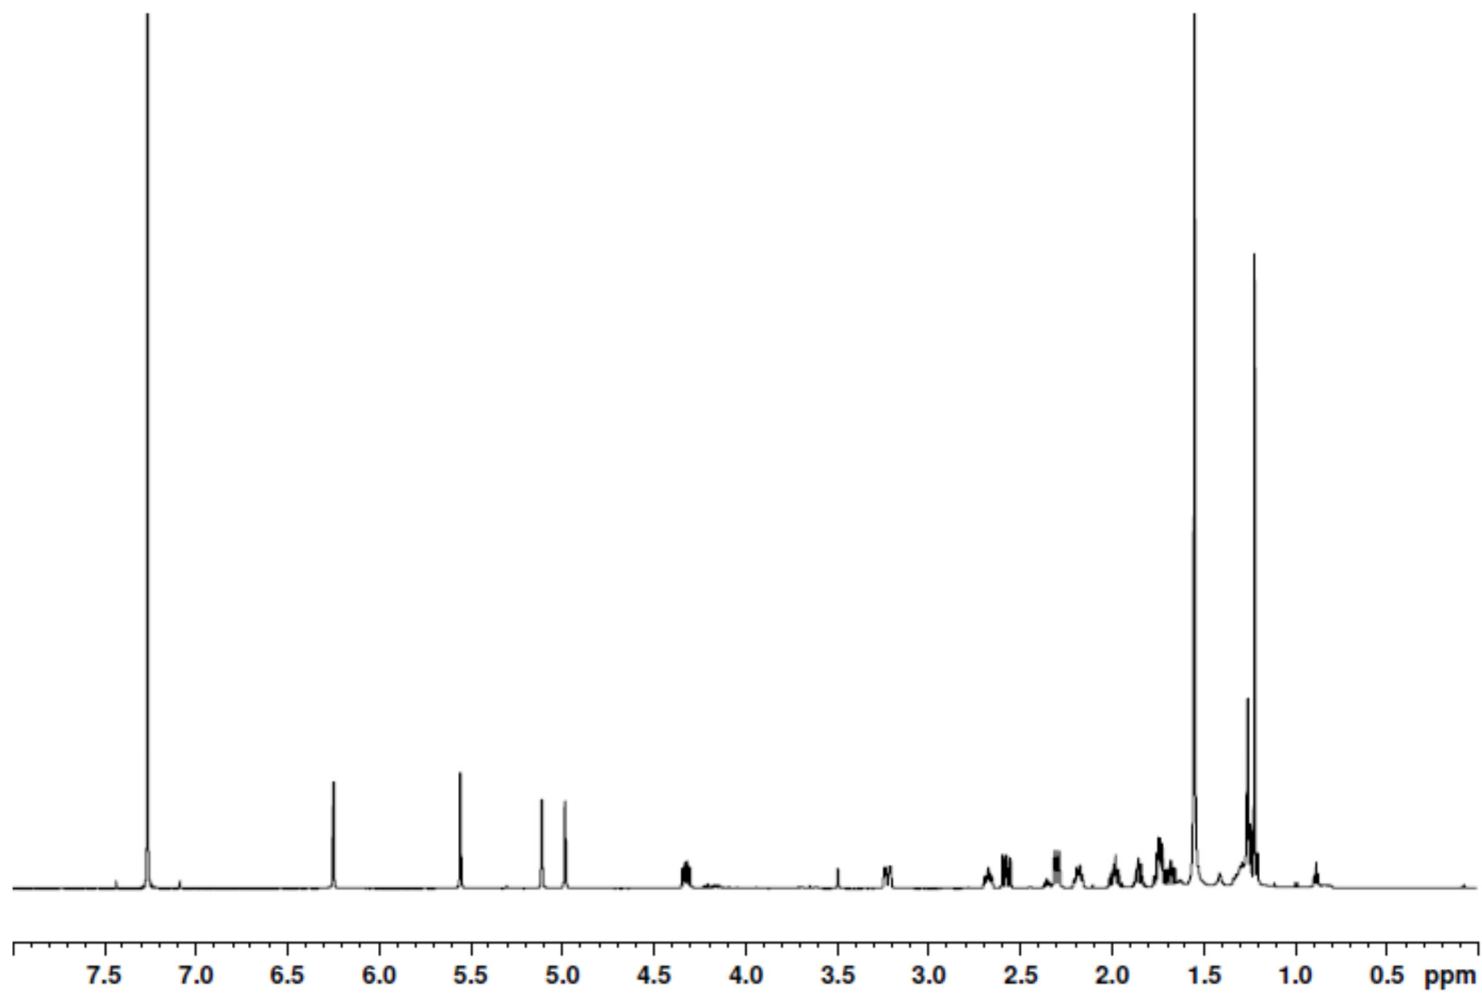

*S17.*  $^1\text{H}$  NMR spectrum of inuviscolide (**3**) (600 MHz,  $\text{CDCl}_3$ )

*SI8*

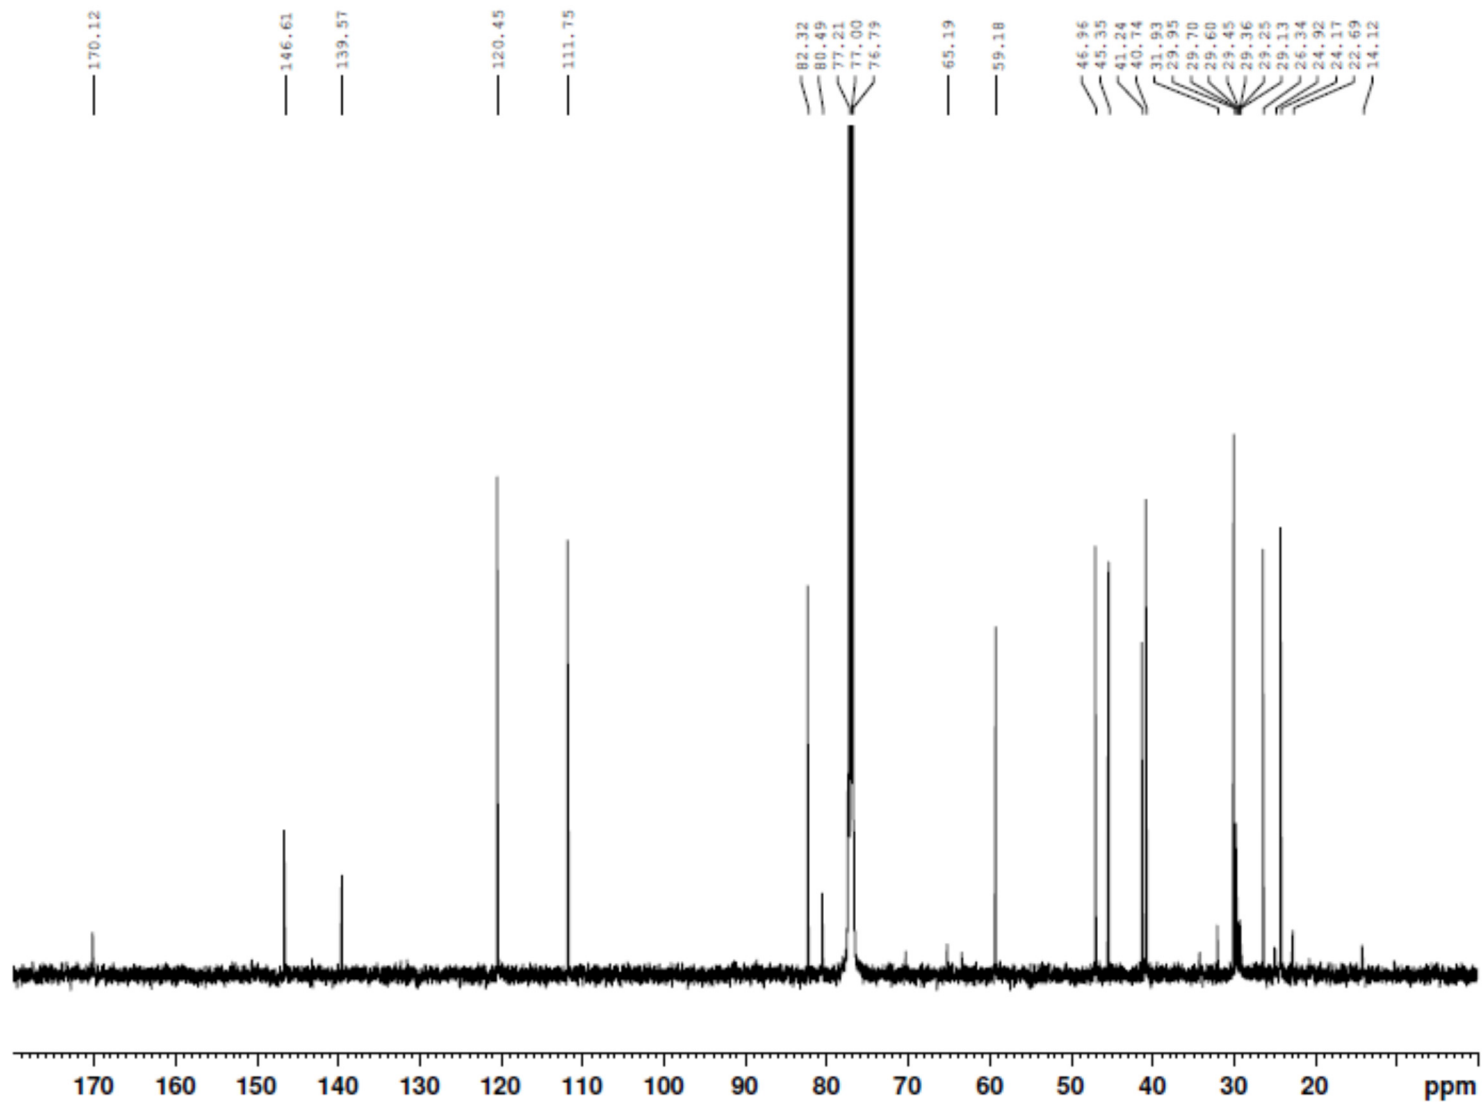

*SI8*. <sup>13</sup>C NMR spectrum of inuviscolide (**3**) (150 MHz, CDCl<sub>3</sub>)

S19

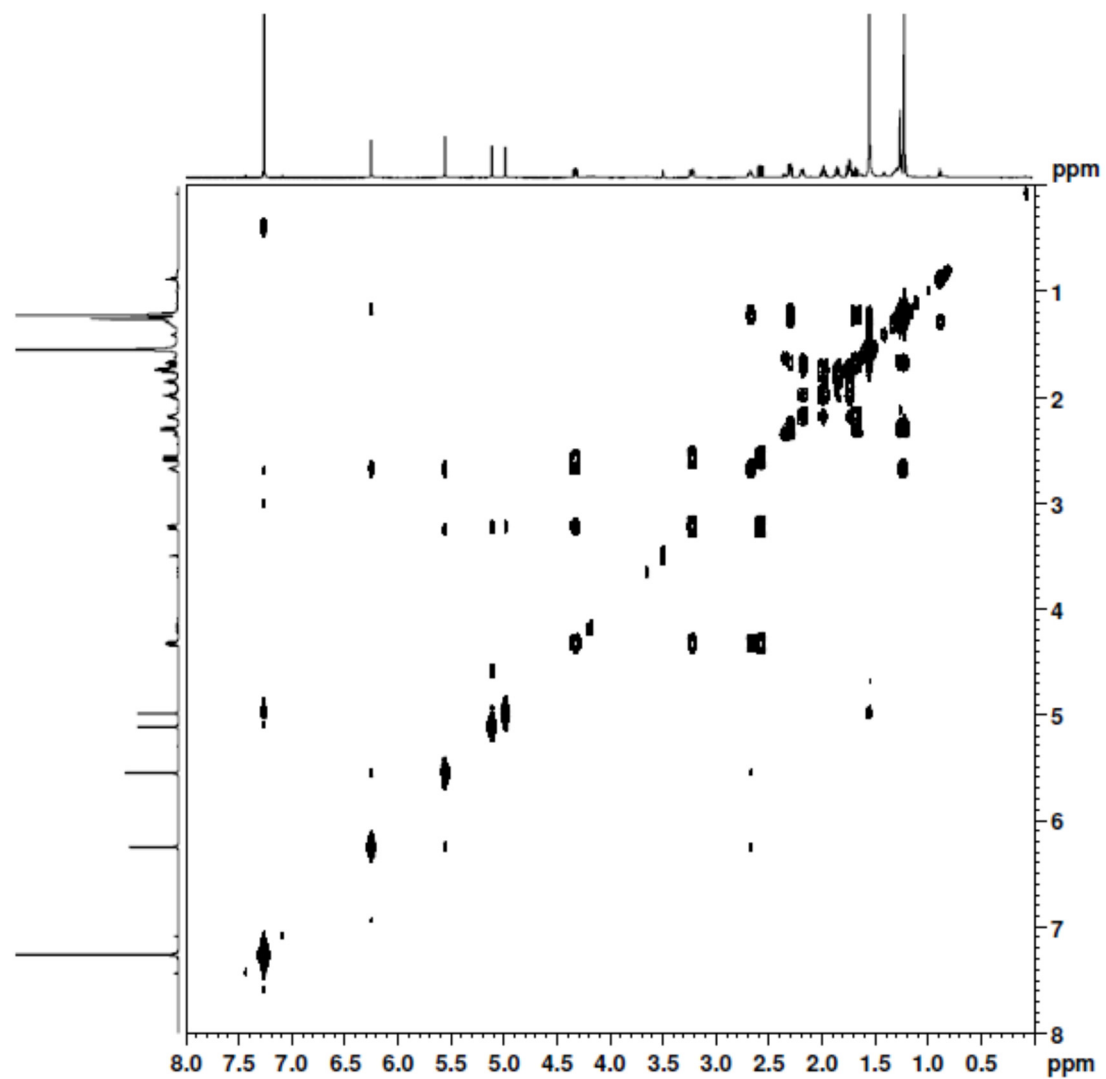

S19. COSY spectrum of inuviscolide (**3**) (600 MHz, CDCl<sub>3</sub>)

*S20*

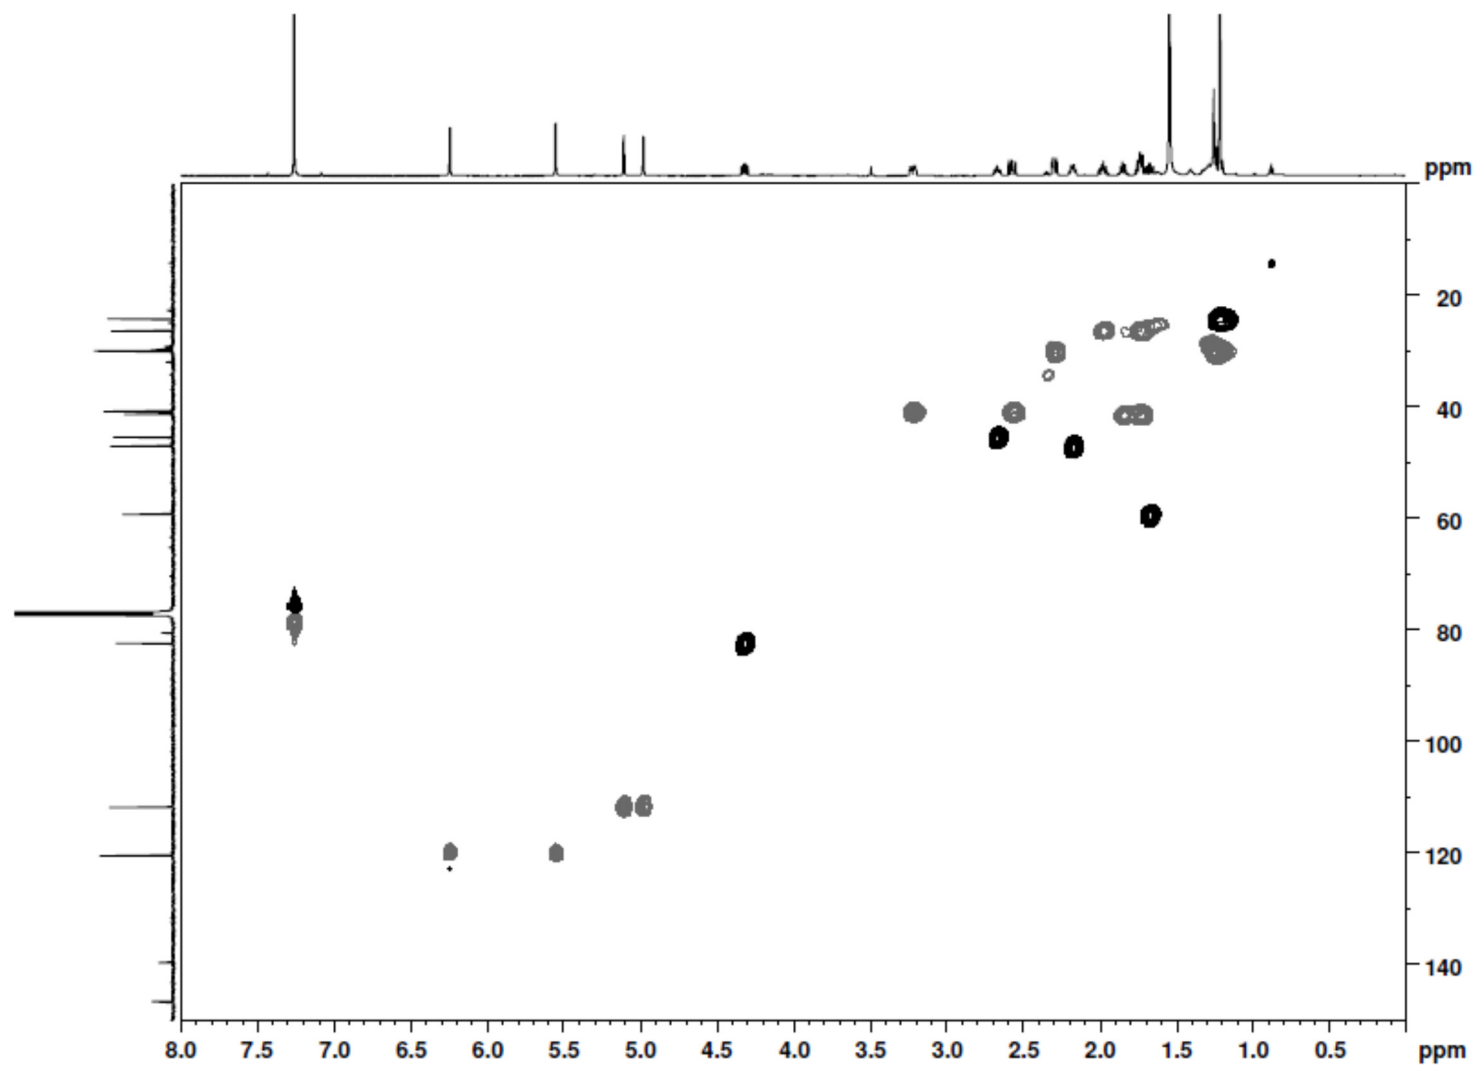

*S20*. ed-HSQC spectrum of inuviscolide (3) (600 MHz, CDCl<sub>3</sub>)

S21

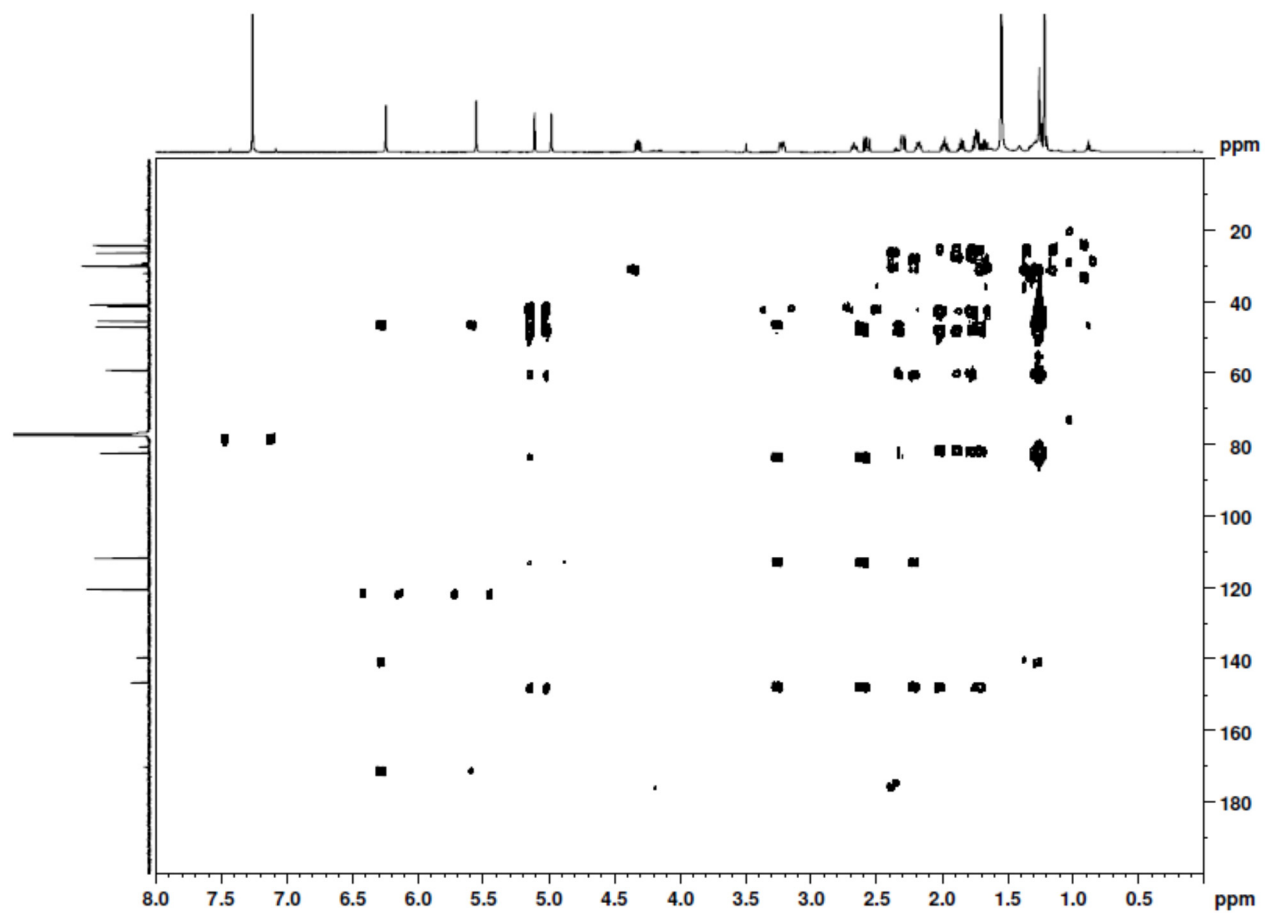

S21. HMBC spectrum of inuviscolide (3) (600 MHz, CDCl<sub>3</sub>)

S22

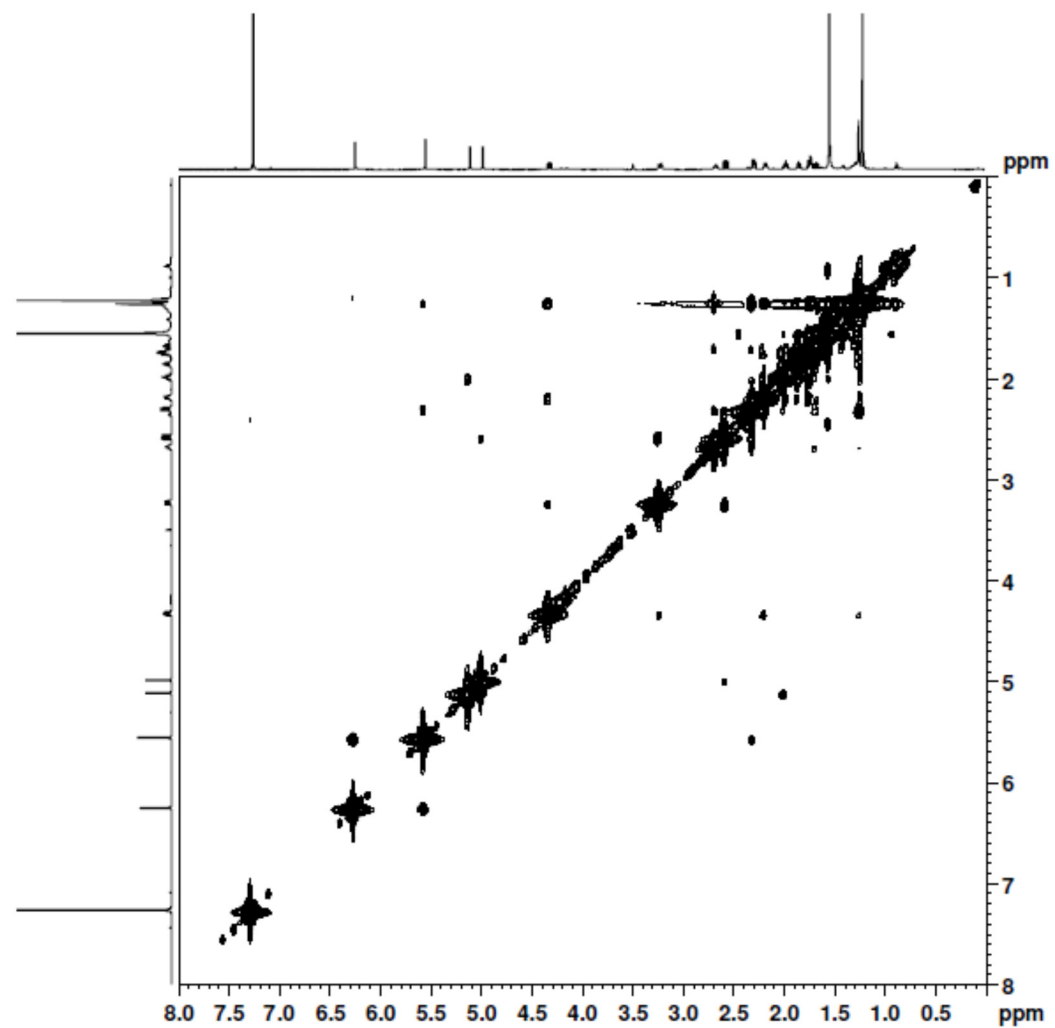

S22. NOESY spectrum of inuviscolide (**3**) (600 MHz, CDCl<sub>3</sub>)



S23

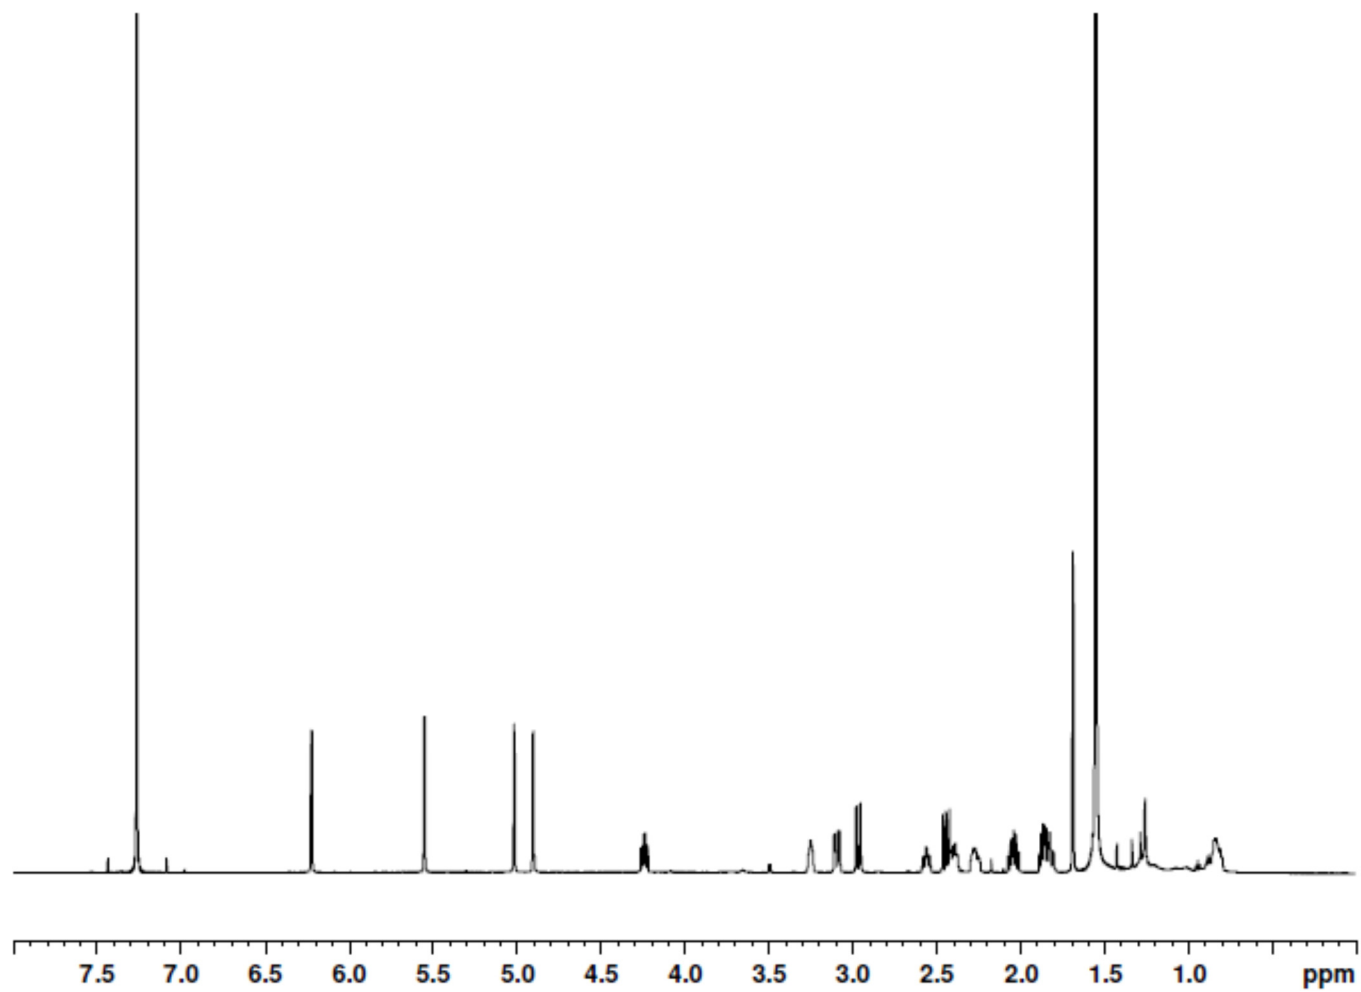

S23.  $^1\text{H}$  NMR spectrum of dehydration derivative of inuviscolide (600 MHz,  $\text{CDCl}_3$ )

S24

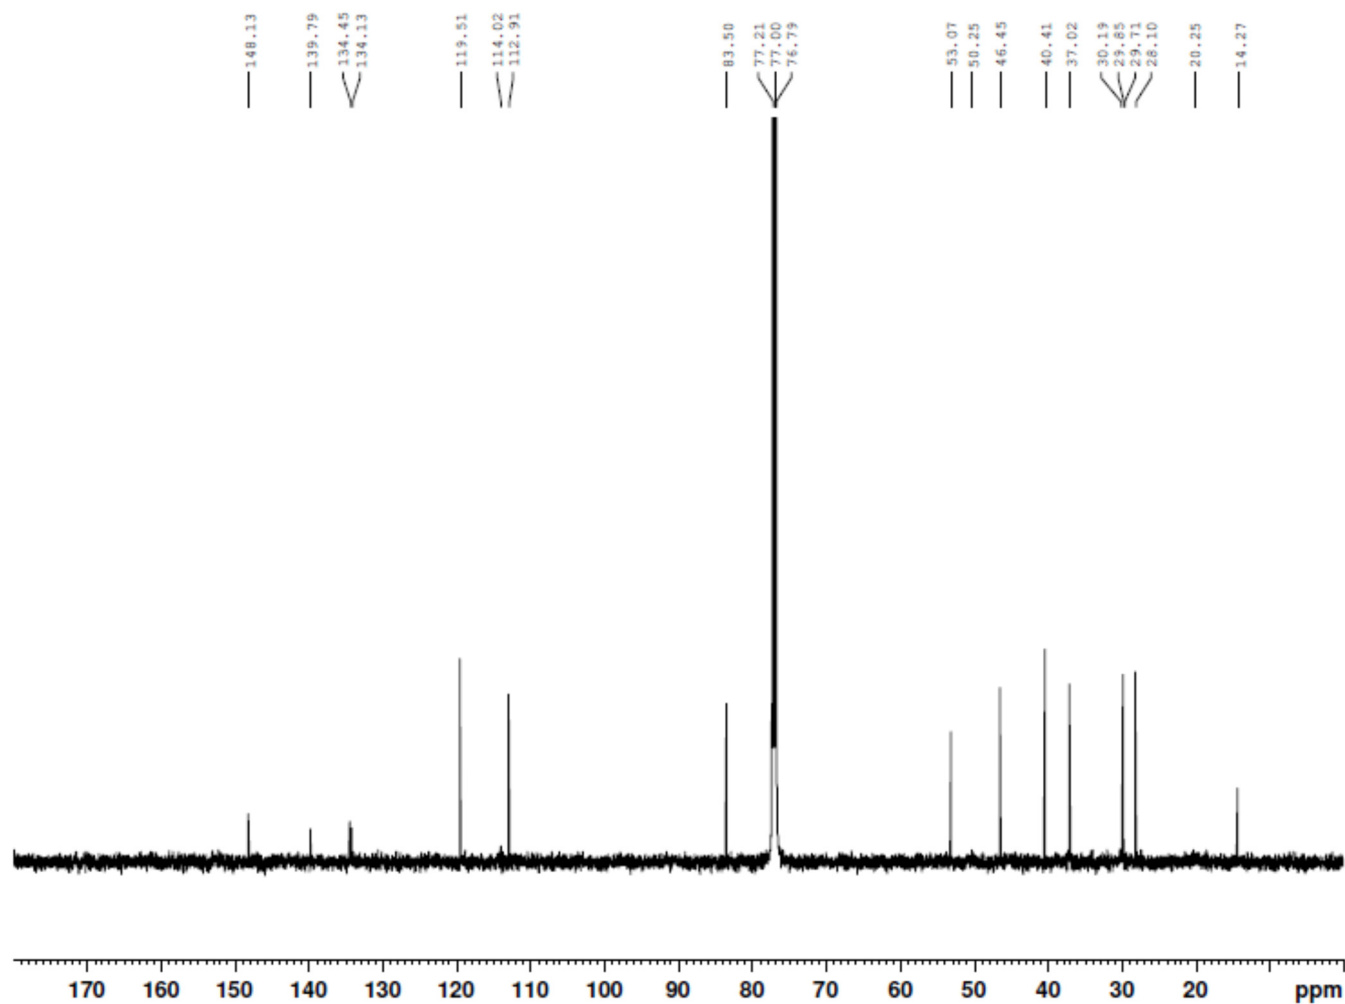

S24. <sup>13</sup>C NMR spectrum of dehydration derivative of inuviscolide (600 MHz, CDCl<sub>3</sub>)

S25

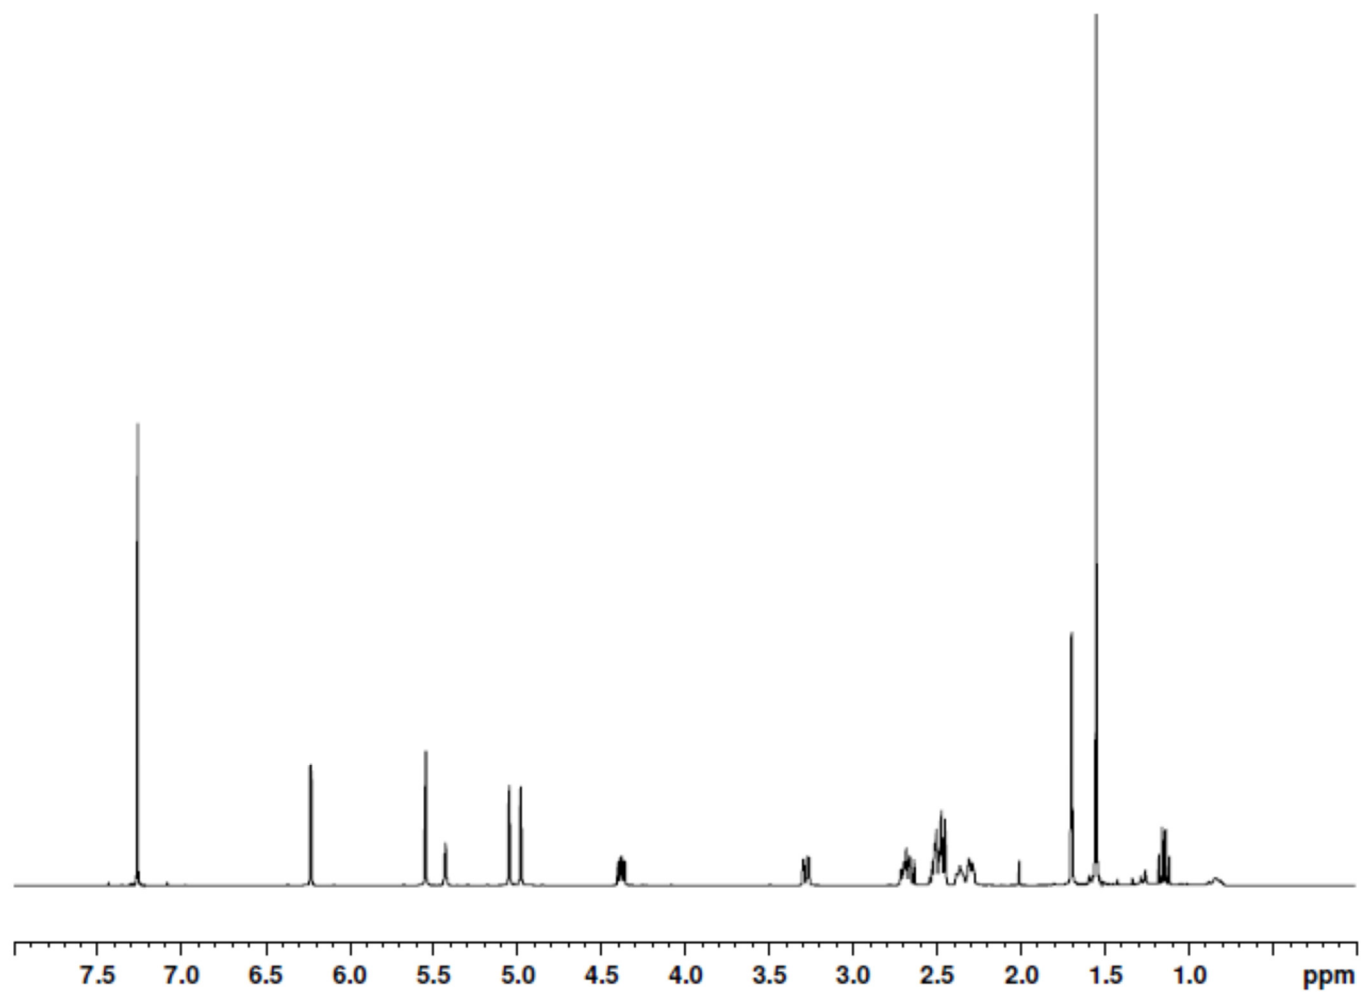

S25.  $^1\text{H}$  NMR spectrum of dehydration derivative of inuviscolide (600 MHz,  $\text{CDCl}_3$ )

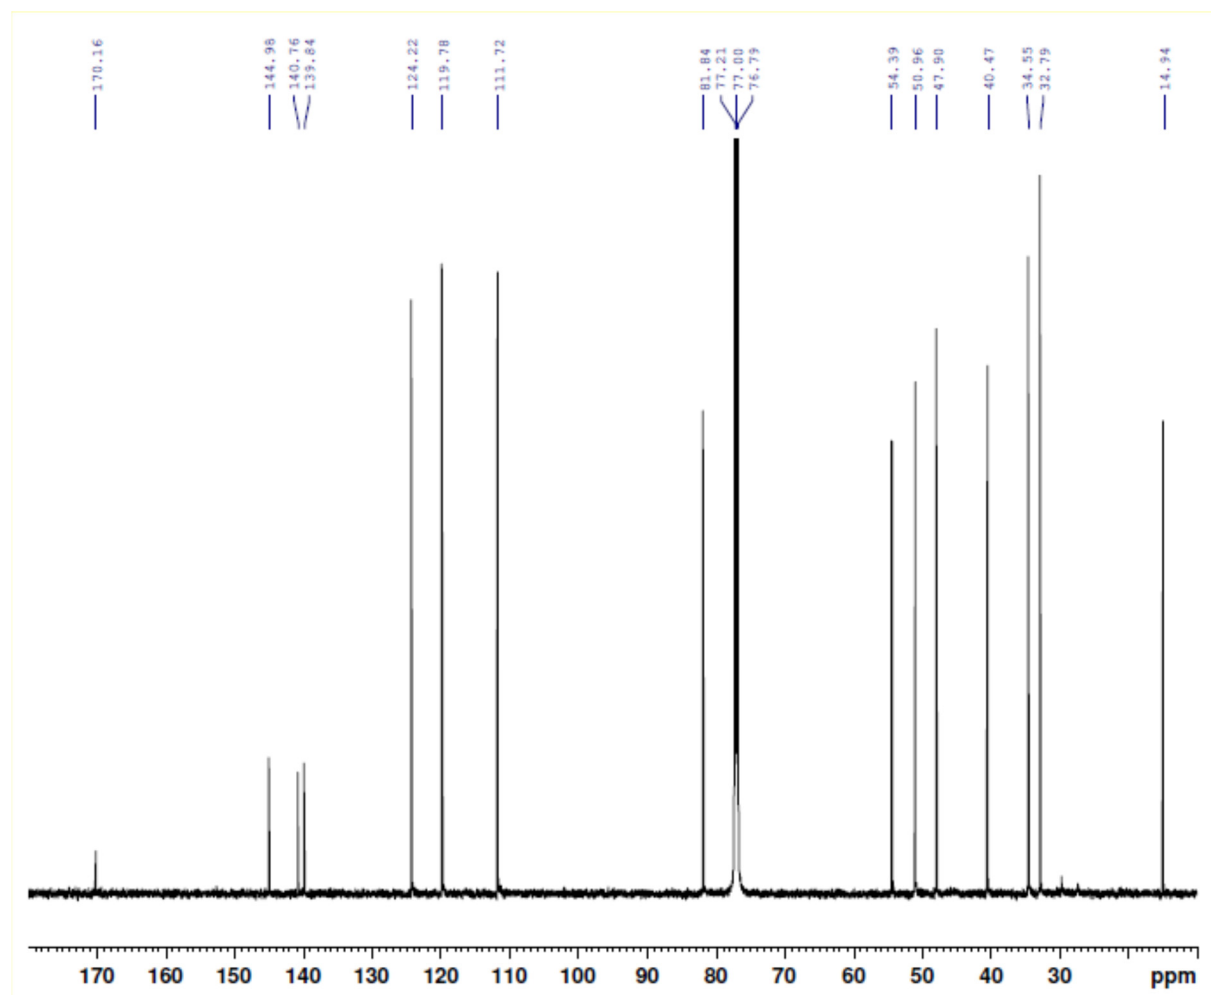

S26. <sup>13</sup>C NMR spectrum of dehydration derivative of inuviscolide (600 MHz, CDCl<sub>3</sub>)

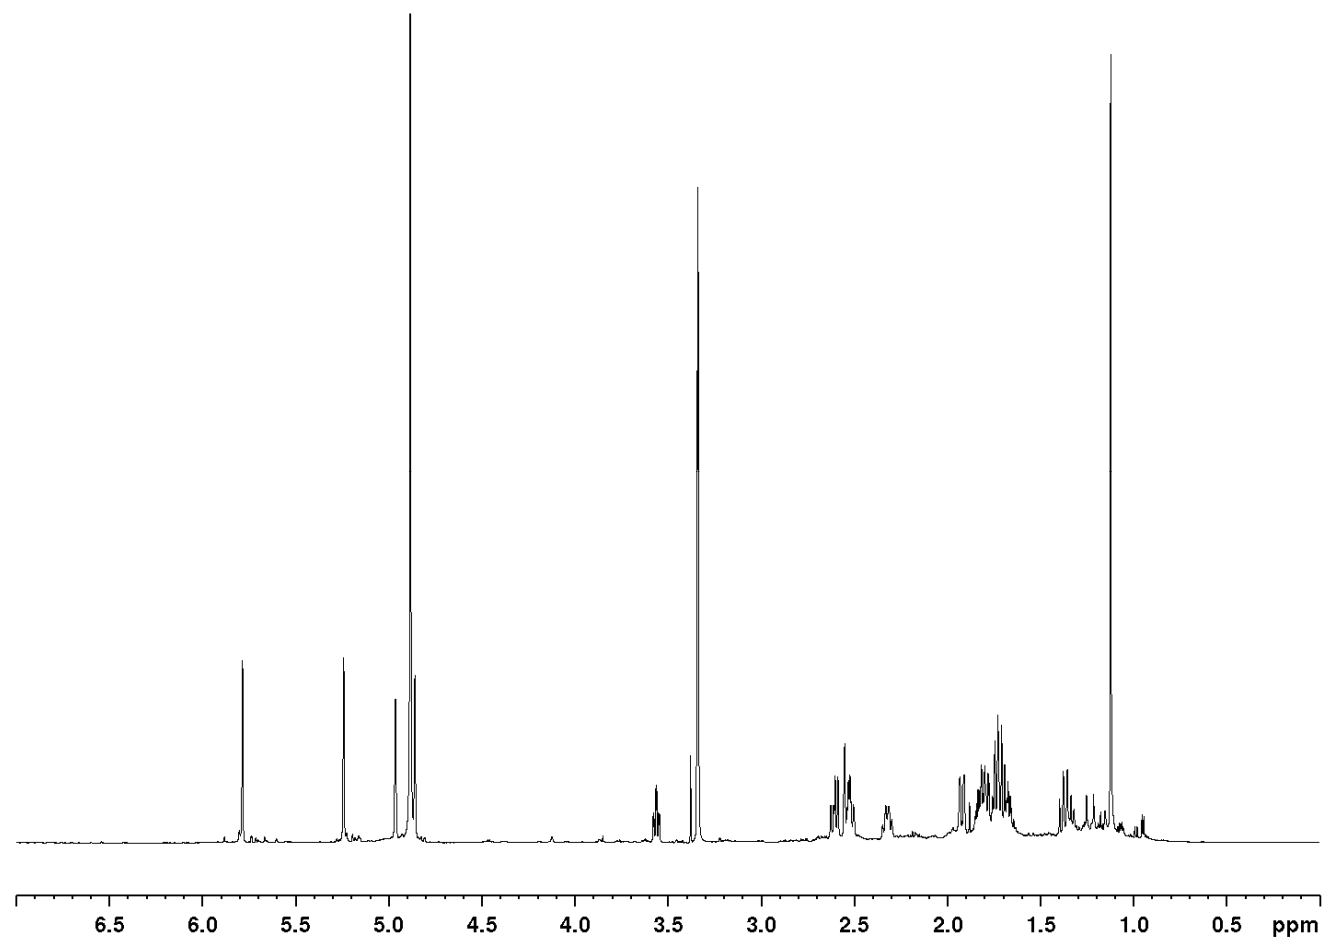

S27.  $^1\text{H}$  NMR spectrum of alcohol (4) (600 MHz,  $\text{CDCl}_3$ )

S28

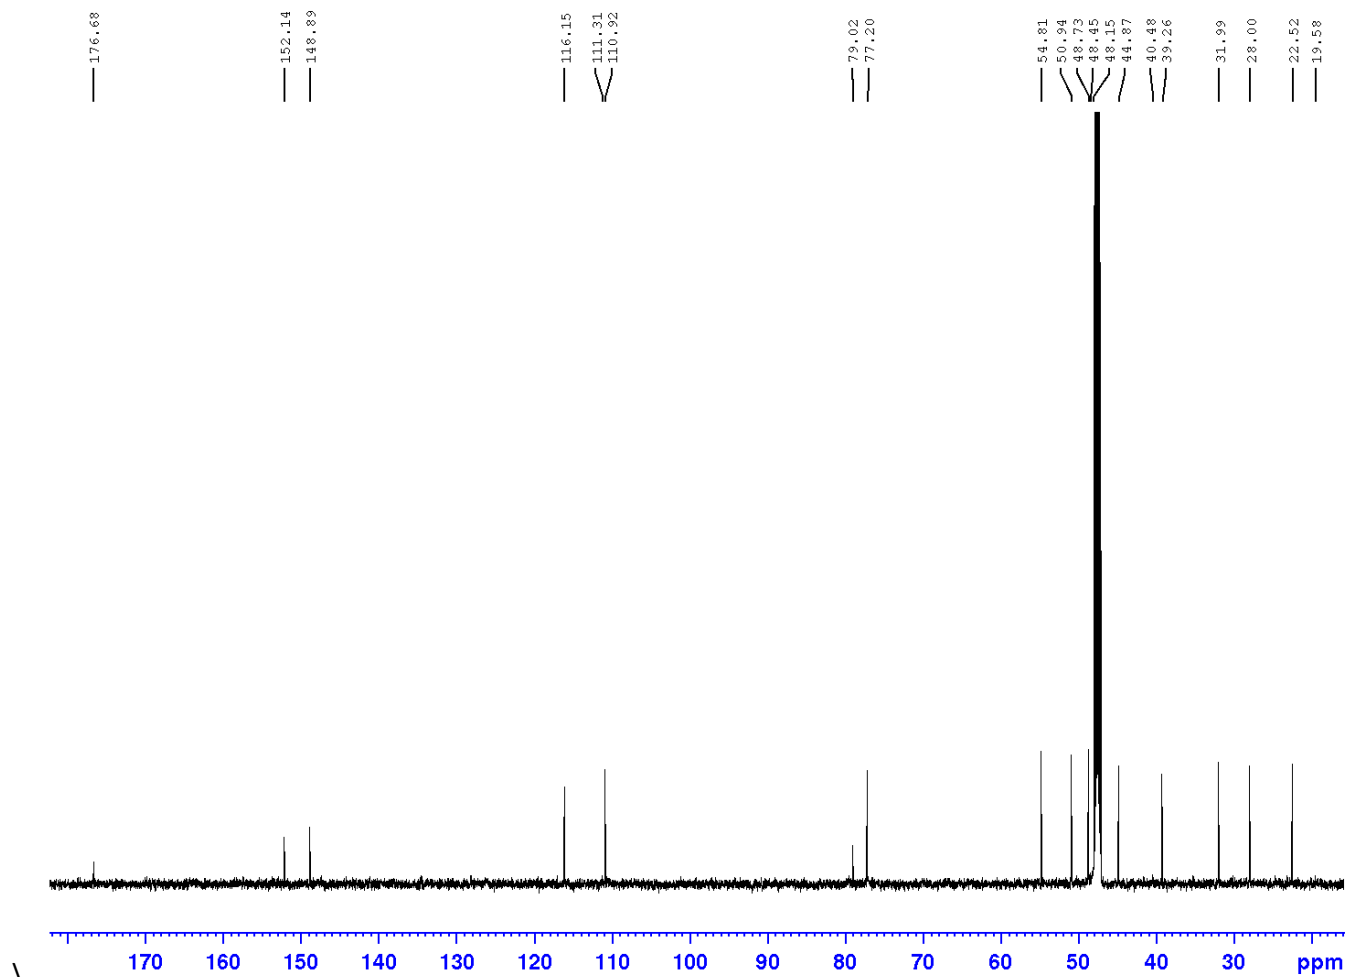

S28.  $^{13}\text{C}$  NMR spectrum of alcohol (4) (150 MHz,  $\text{CDCl}_3$ )

S29

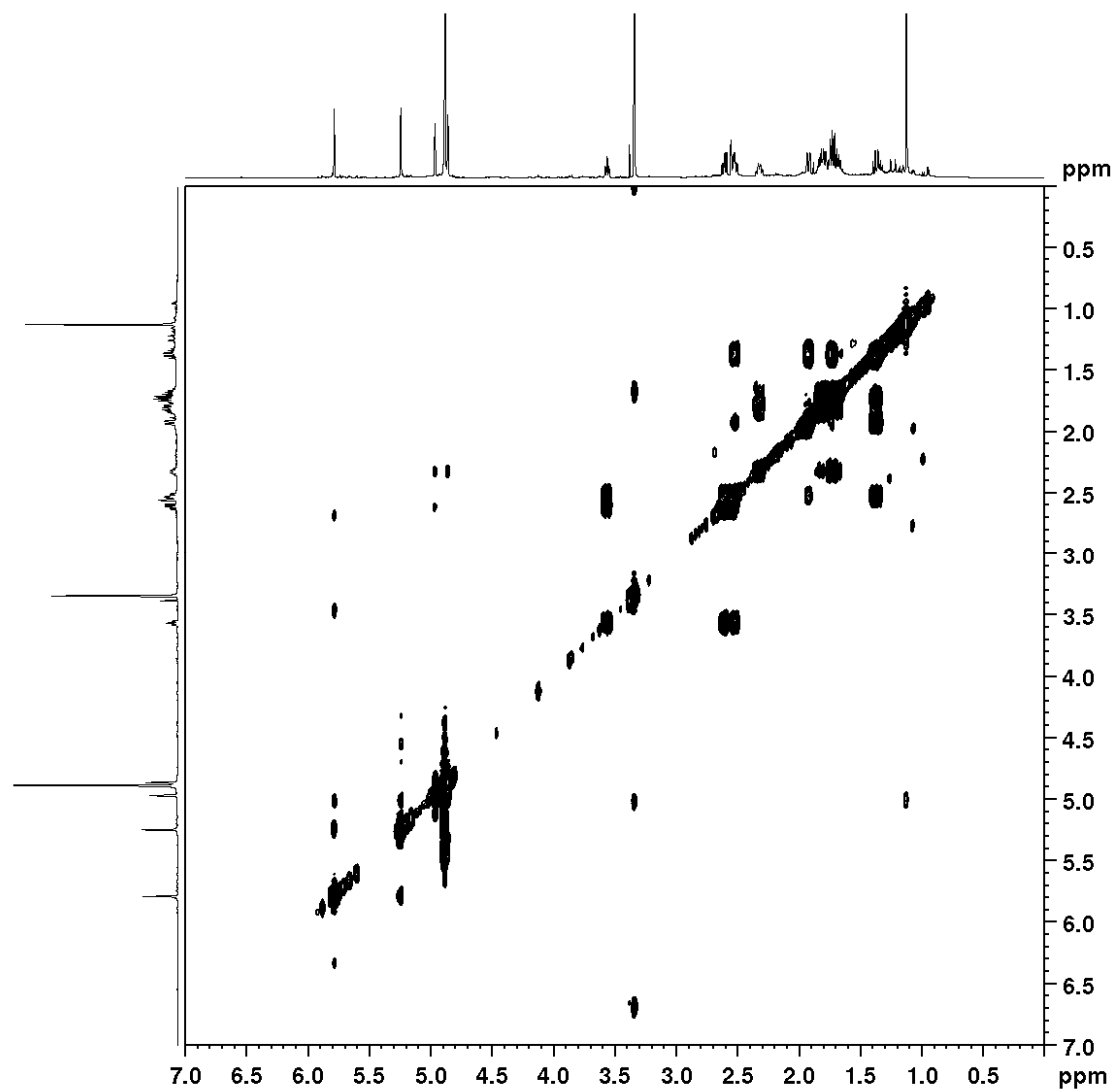

S29. COSY spectrum of alcohol (4) (600 MHz, CDCl<sub>3</sub>)

S30

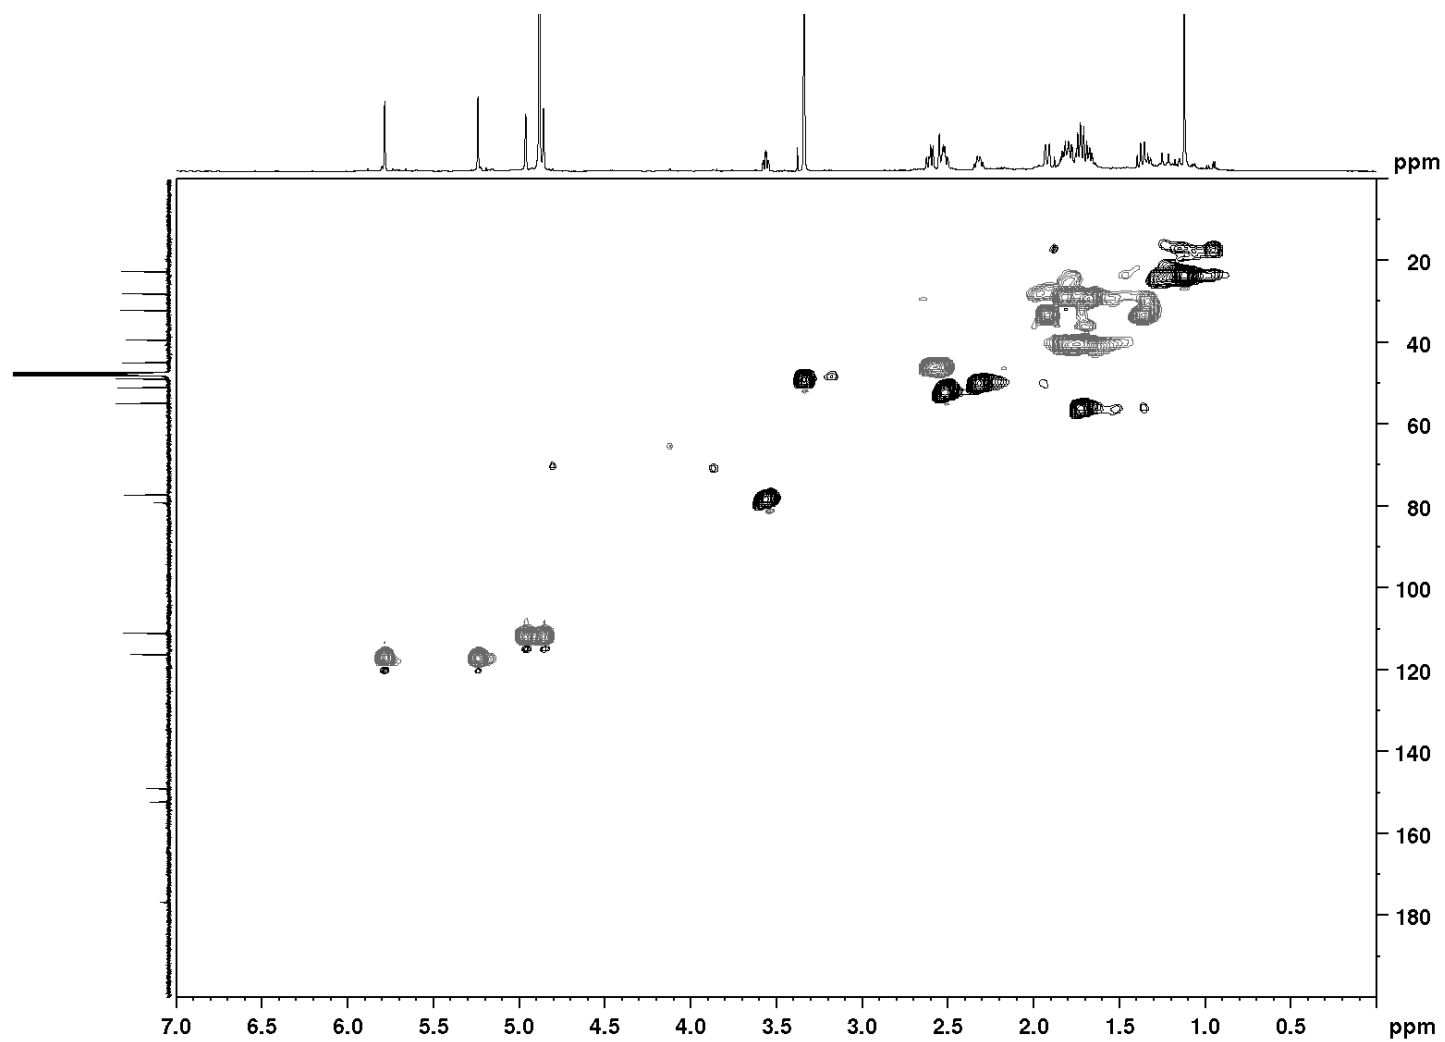

S30. ed-HSQC spectrum of alcohol (4) (600 MHz, CDCl<sub>3</sub>)



S31

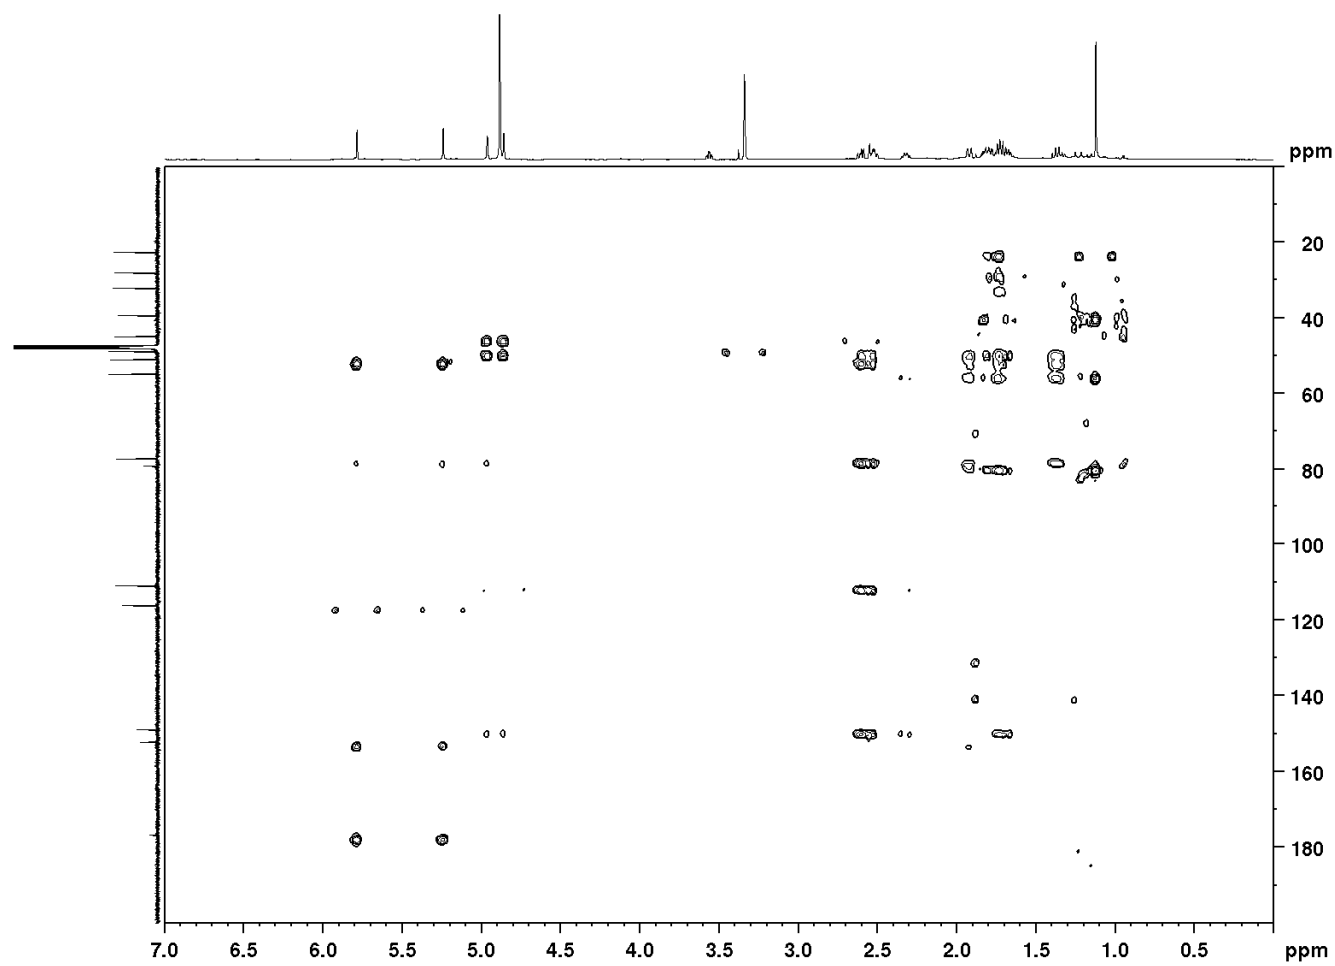

S31. HMBC spectrum of alcohol (**4**) (600 MHz,  $\text{CDCl}_3$ )

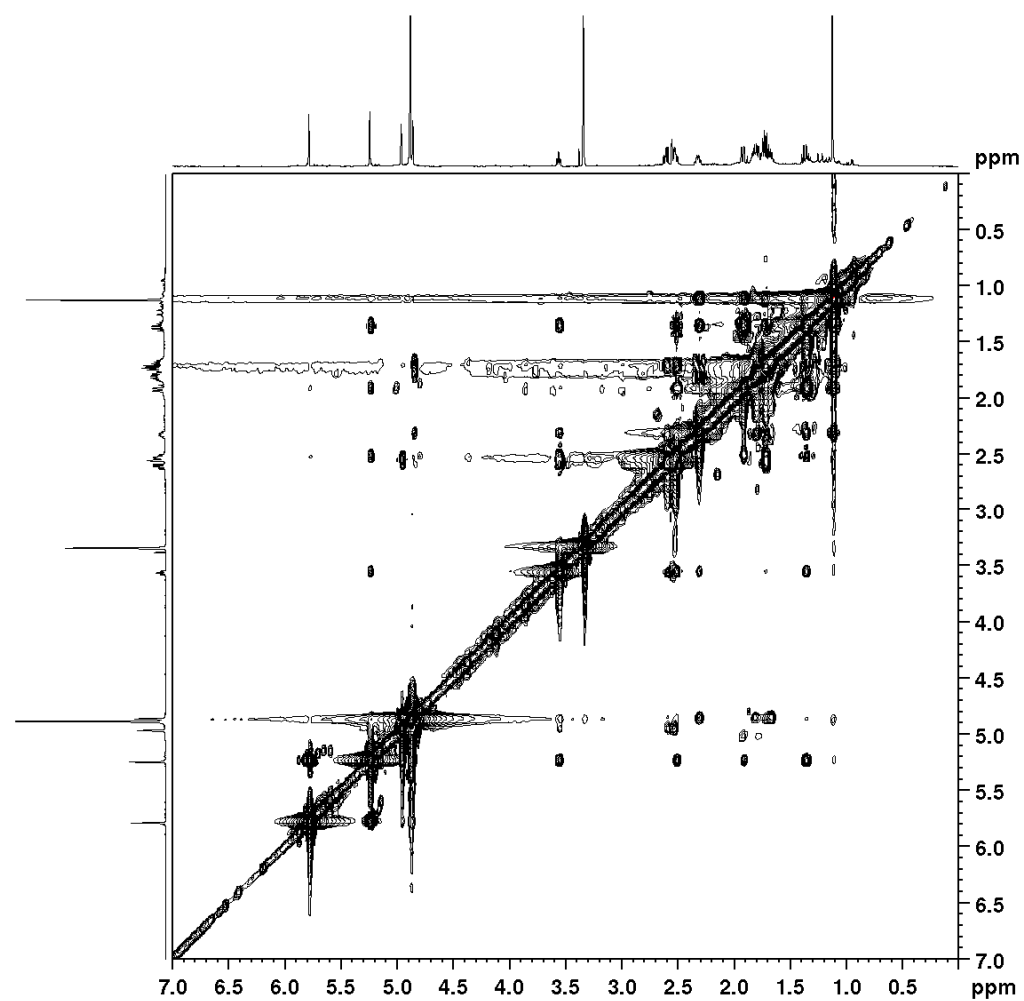

S32. NOESY spectrum of alcohol (4) (600 MHz, CDCl<sub>3</sub>)
